# Supplementary material for: Conformational and oligomeric states of SPOP from small-angle X-ray scattering and molecular dynamics simulations
Source: eLife journal article supplement (doi:10.7554/elife.84147), 2023-02-22

**a** **1. Before fit**  
 $K_{D, \text{isodesmic}}: 1.6 \pm 0.3 \text{ } \mu\text{M}$  (expt)  
 $\chi^2_{r, \text{global}}: 5.56$

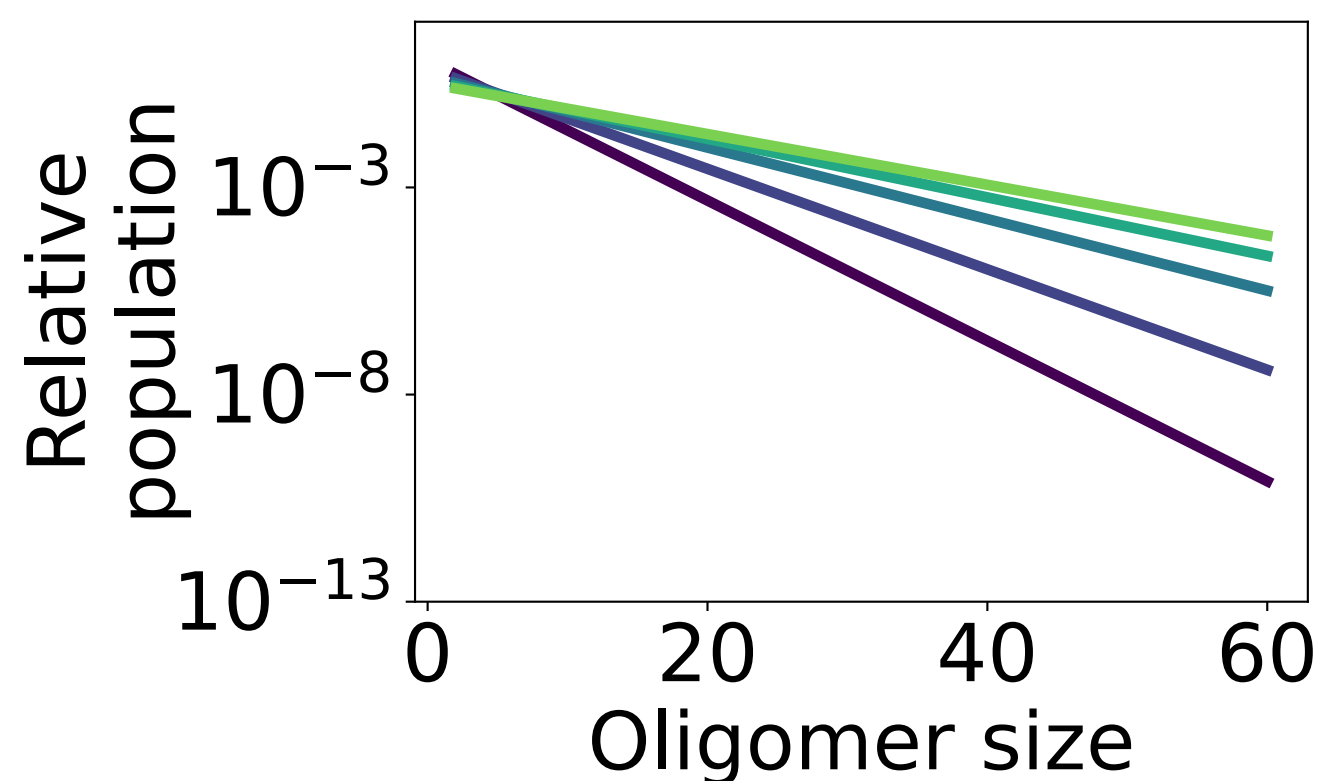

**2. Fit isodesmic  $K_D$**   
 $K_{D, \text{isodesmic}}: 8.2 \pm 2.3 \text{ } \mu\text{M}$   
 $\chi^2_{r, \text{global}}: 1.79$

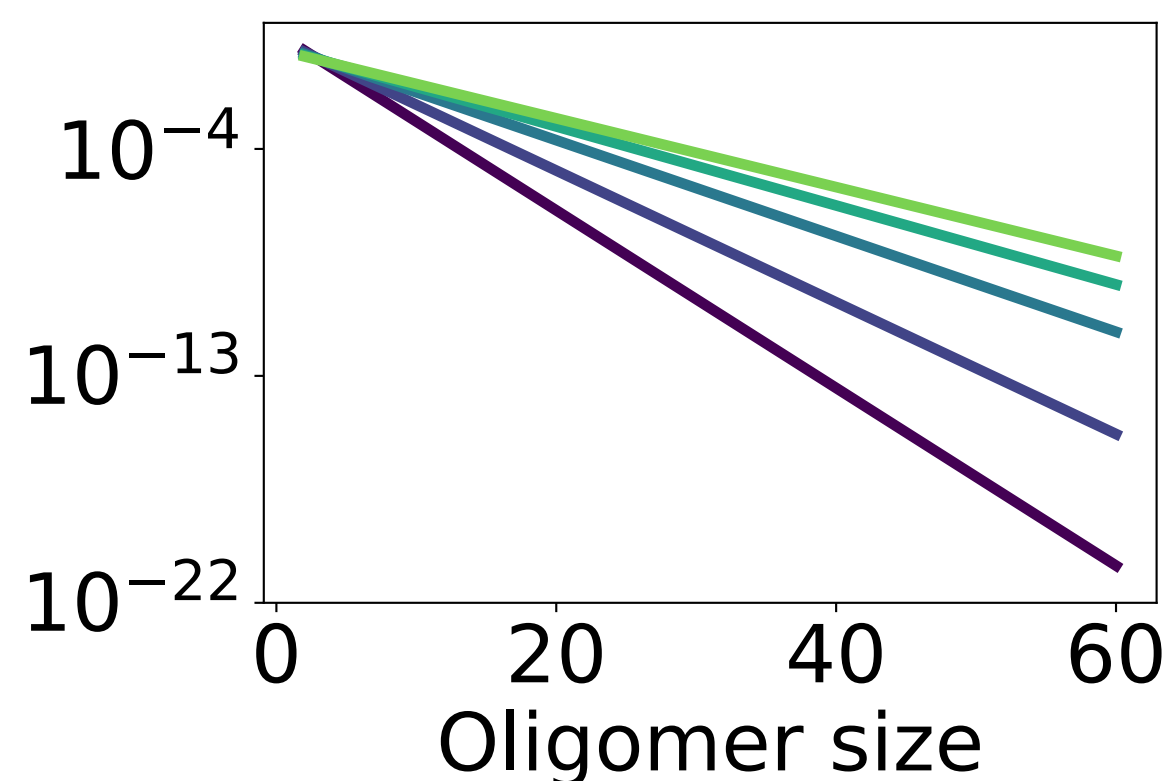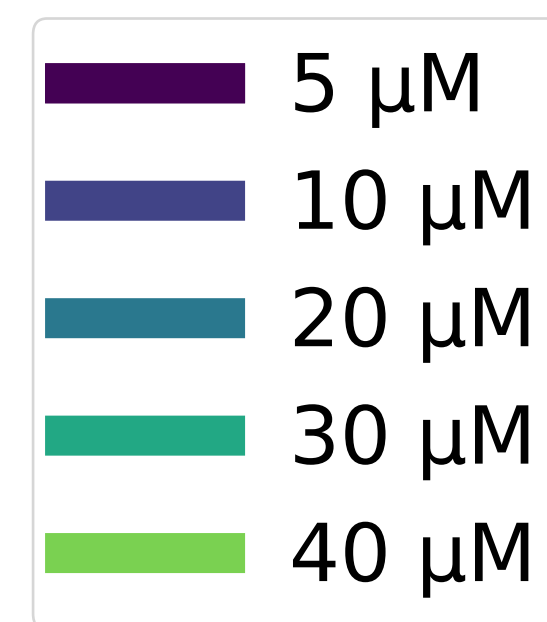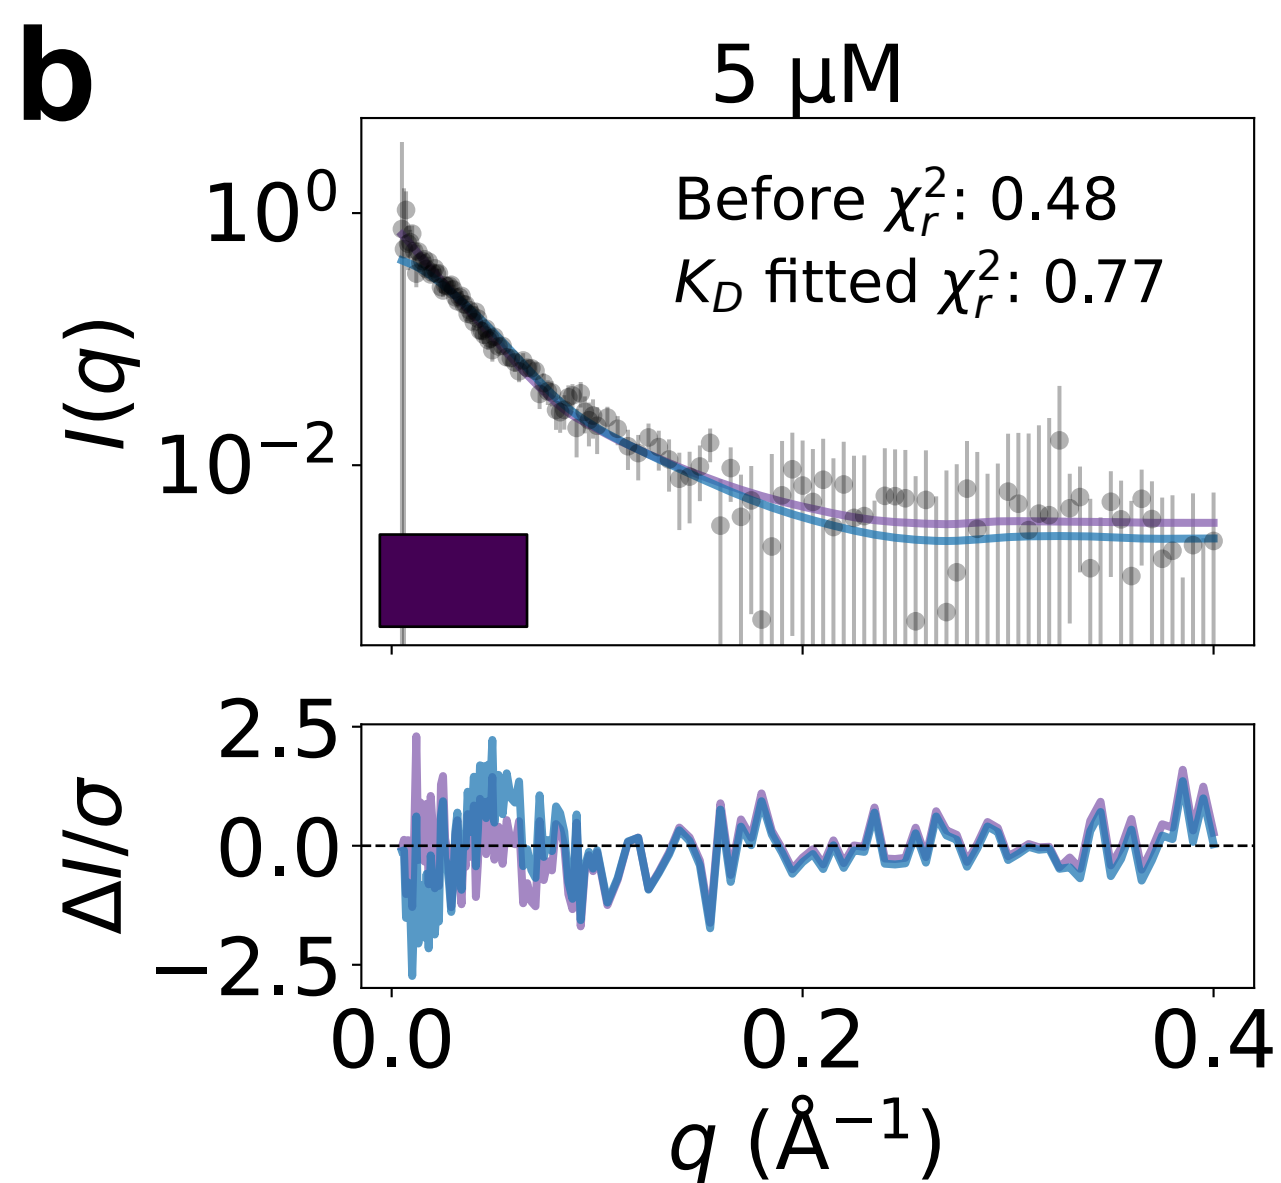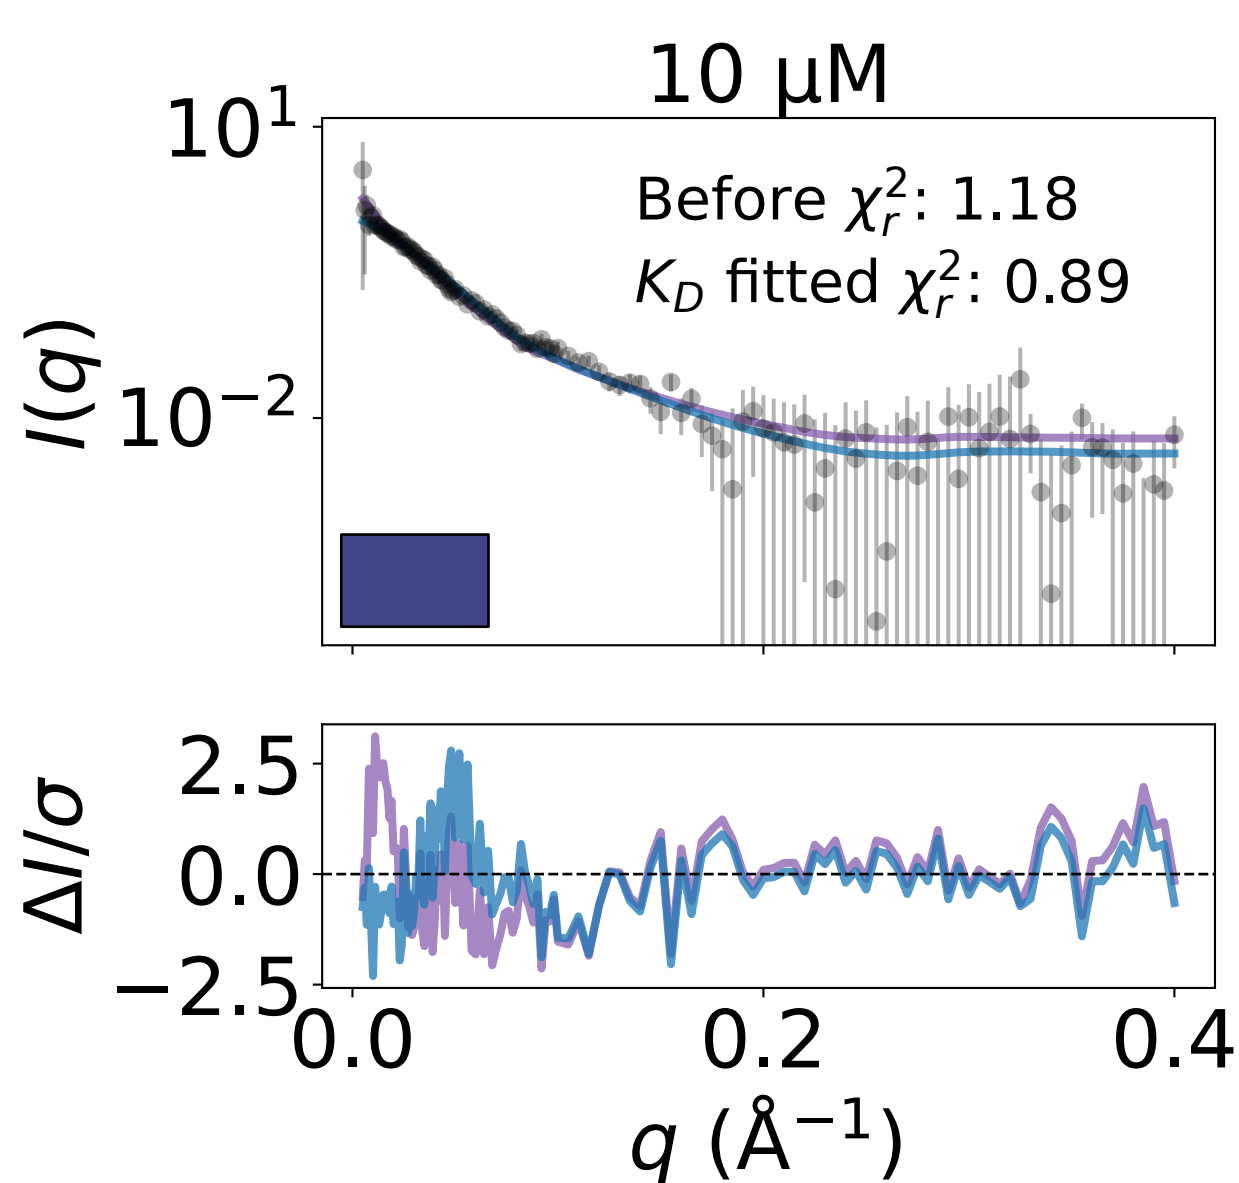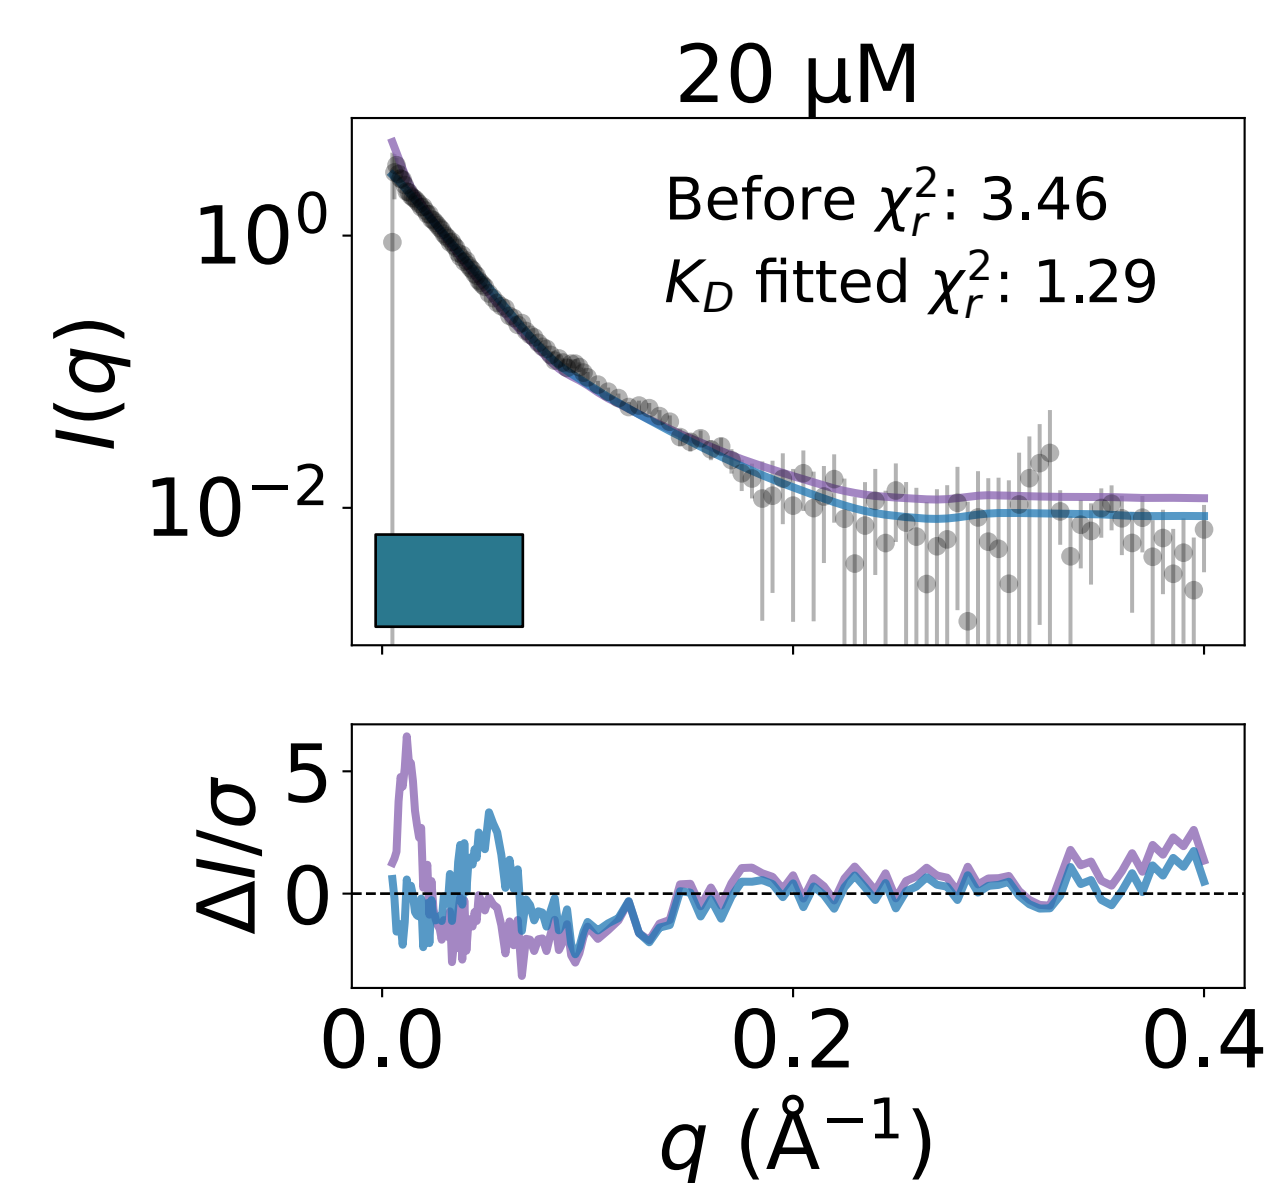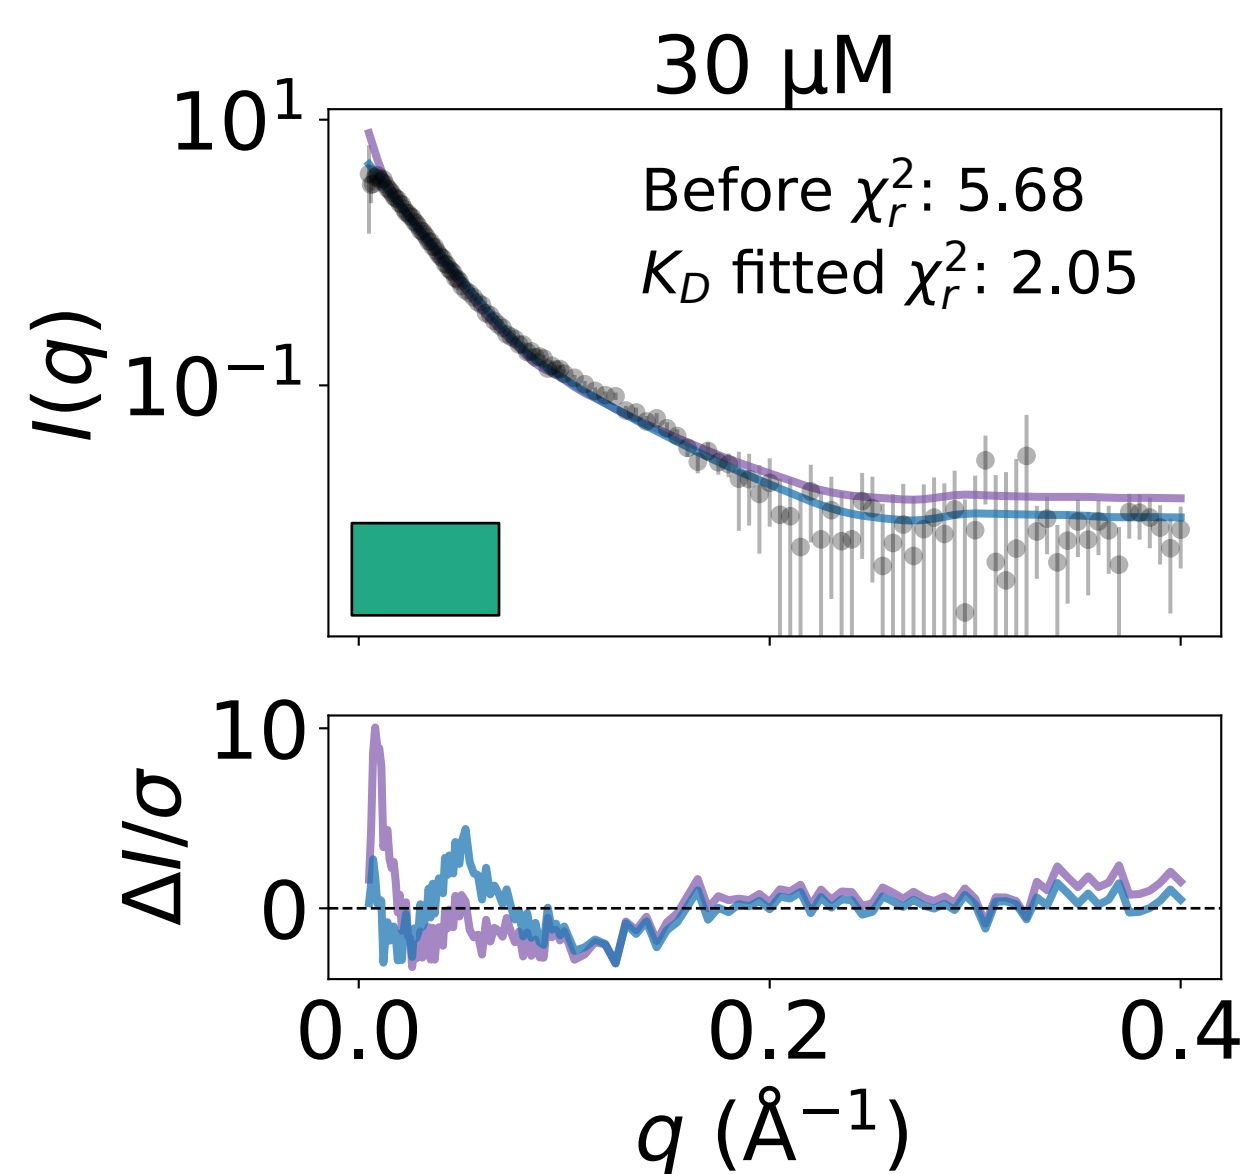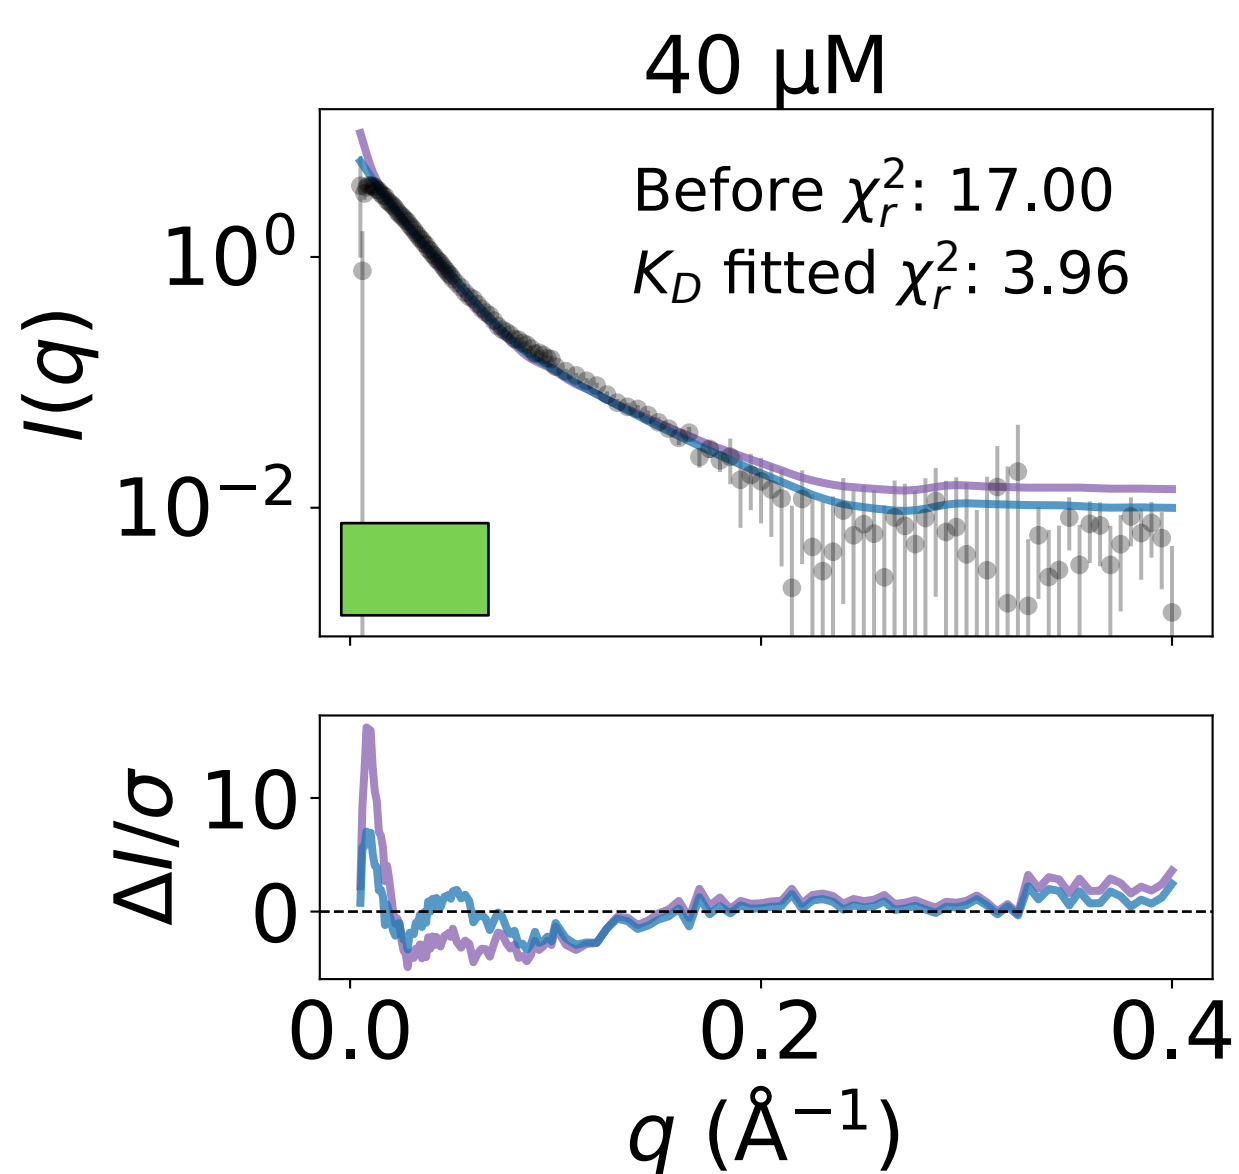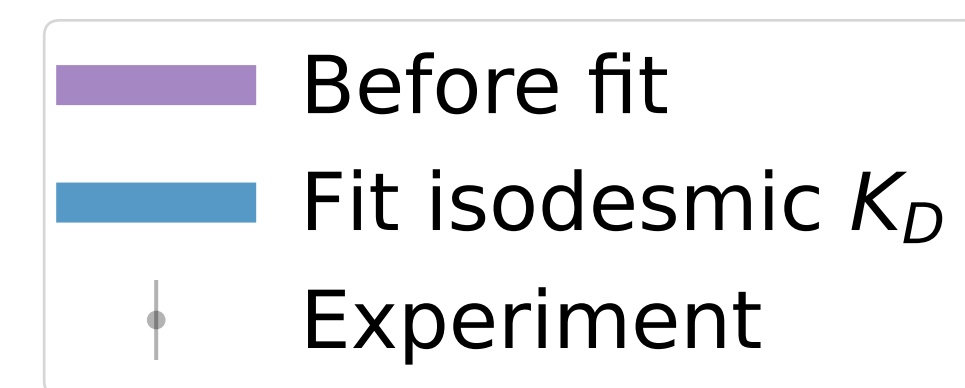

Supplement: supp [file elife-84147-supp-v1.zip]
