# Supplementary material for: Conformational and oligomeric states of SPOP from small-angle X-ray scattering and molecular dynamics simulations
Source: eLife journal article supplement (doi:10.7554/elife.84147), 2023-02-22
Supplement: supp [file elife-84147-supp-v1.zip]

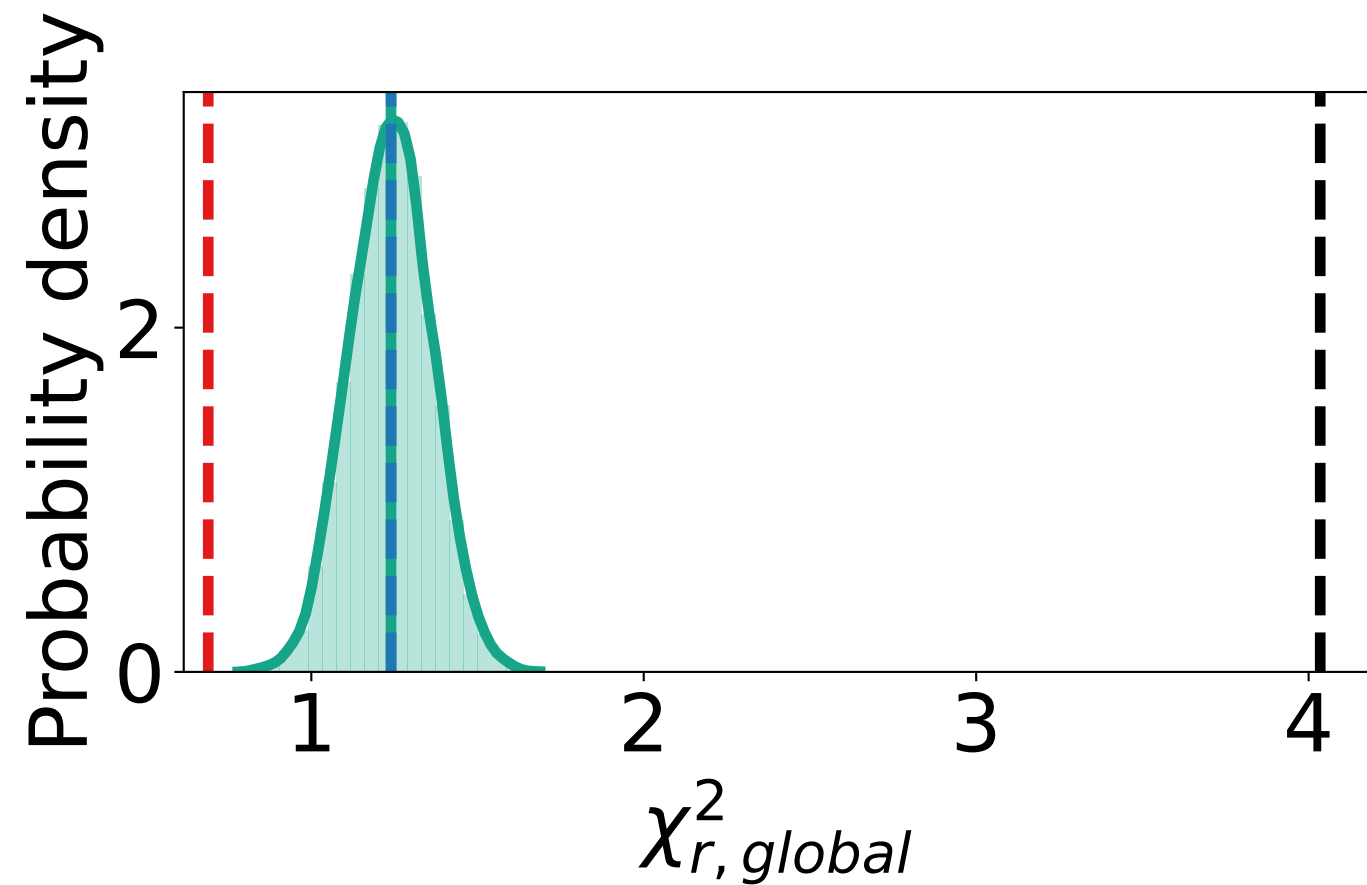

- Single structures from ensemble
- Starting structures
- Ensemble before reweighting
- Ensemble after reweighting
