# Supplementary figures and images for: Conformational and oligomeric states of SPOP from small-angle X-ray scattering and molecular dynamics simulations
Source: eLife journal article supplement (doi:10.7554/elife.84147), 2023-02-22

**a**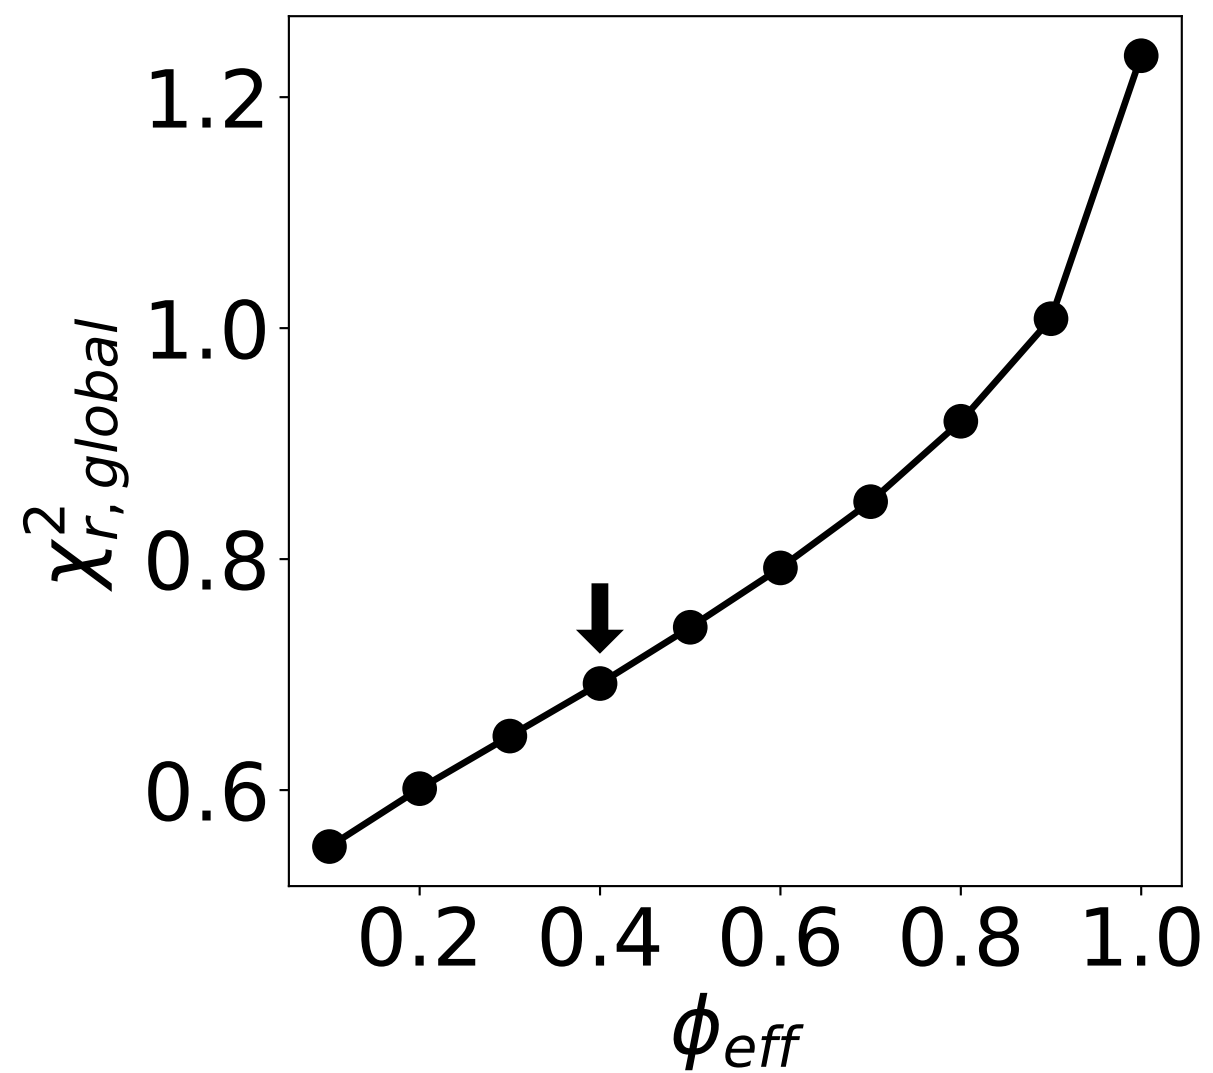**b**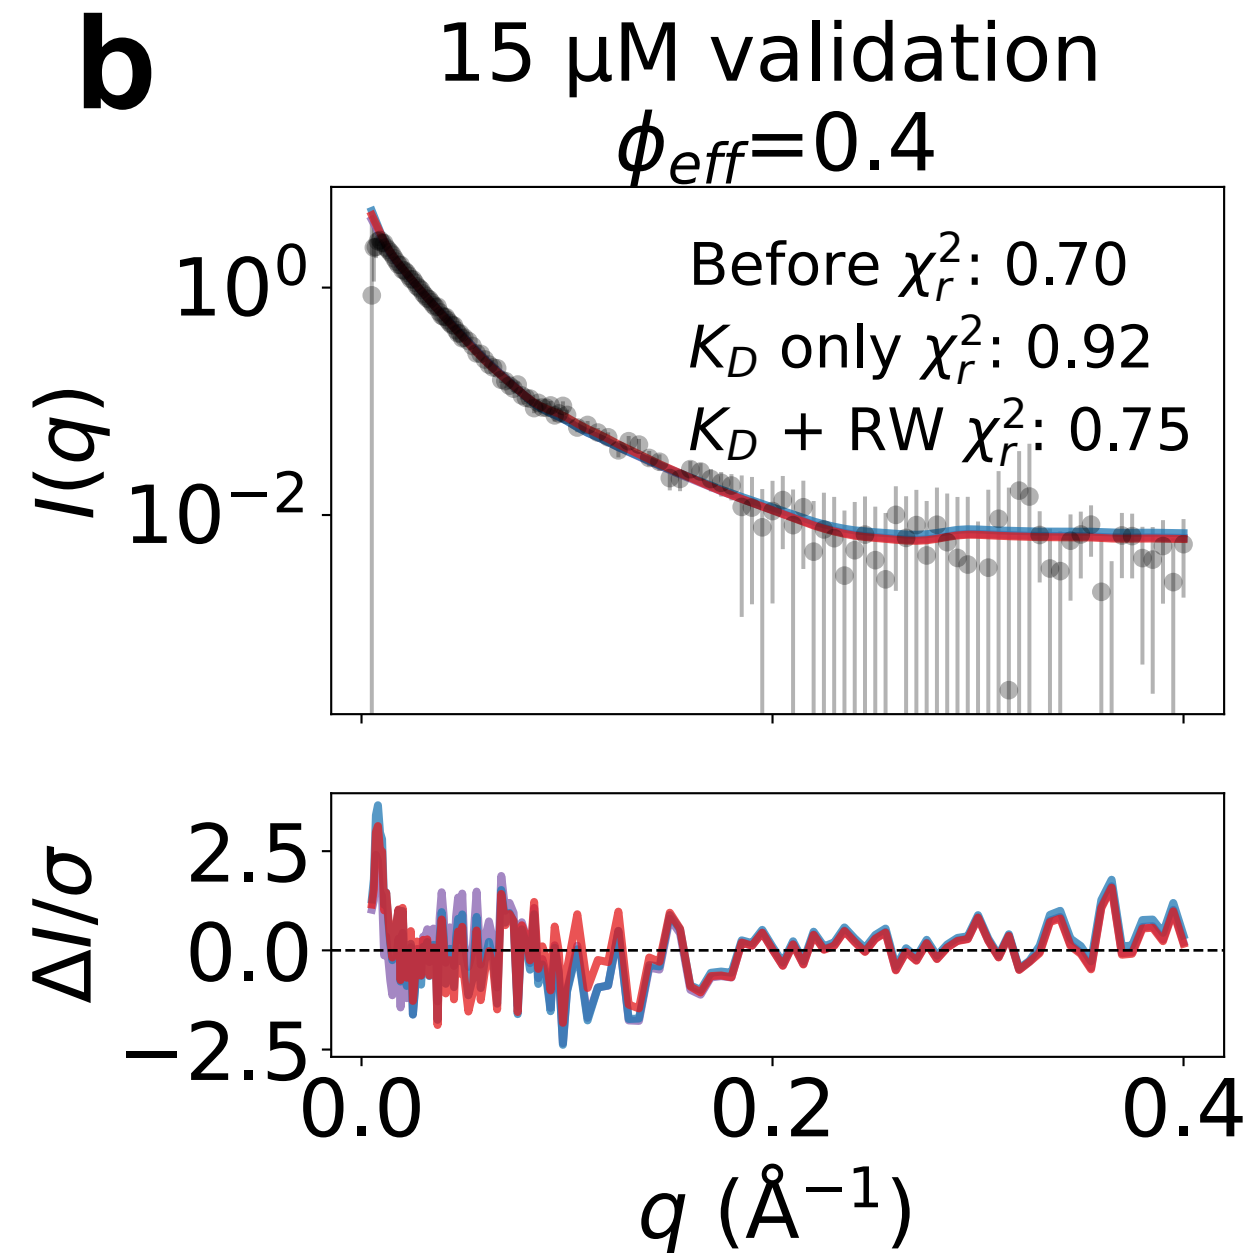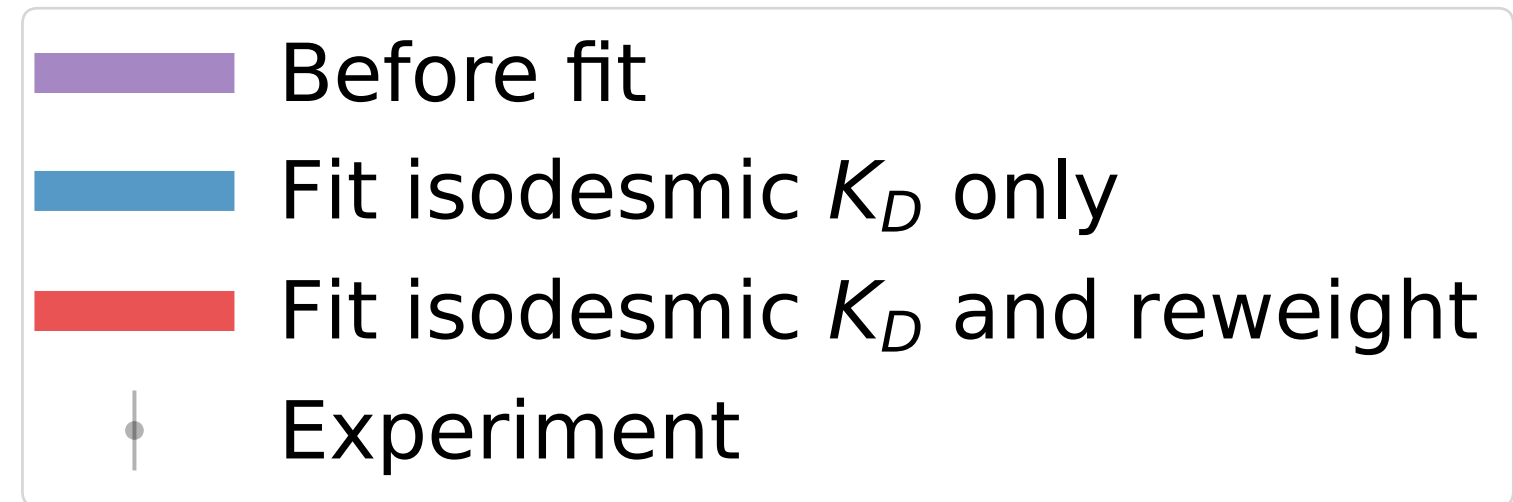**c**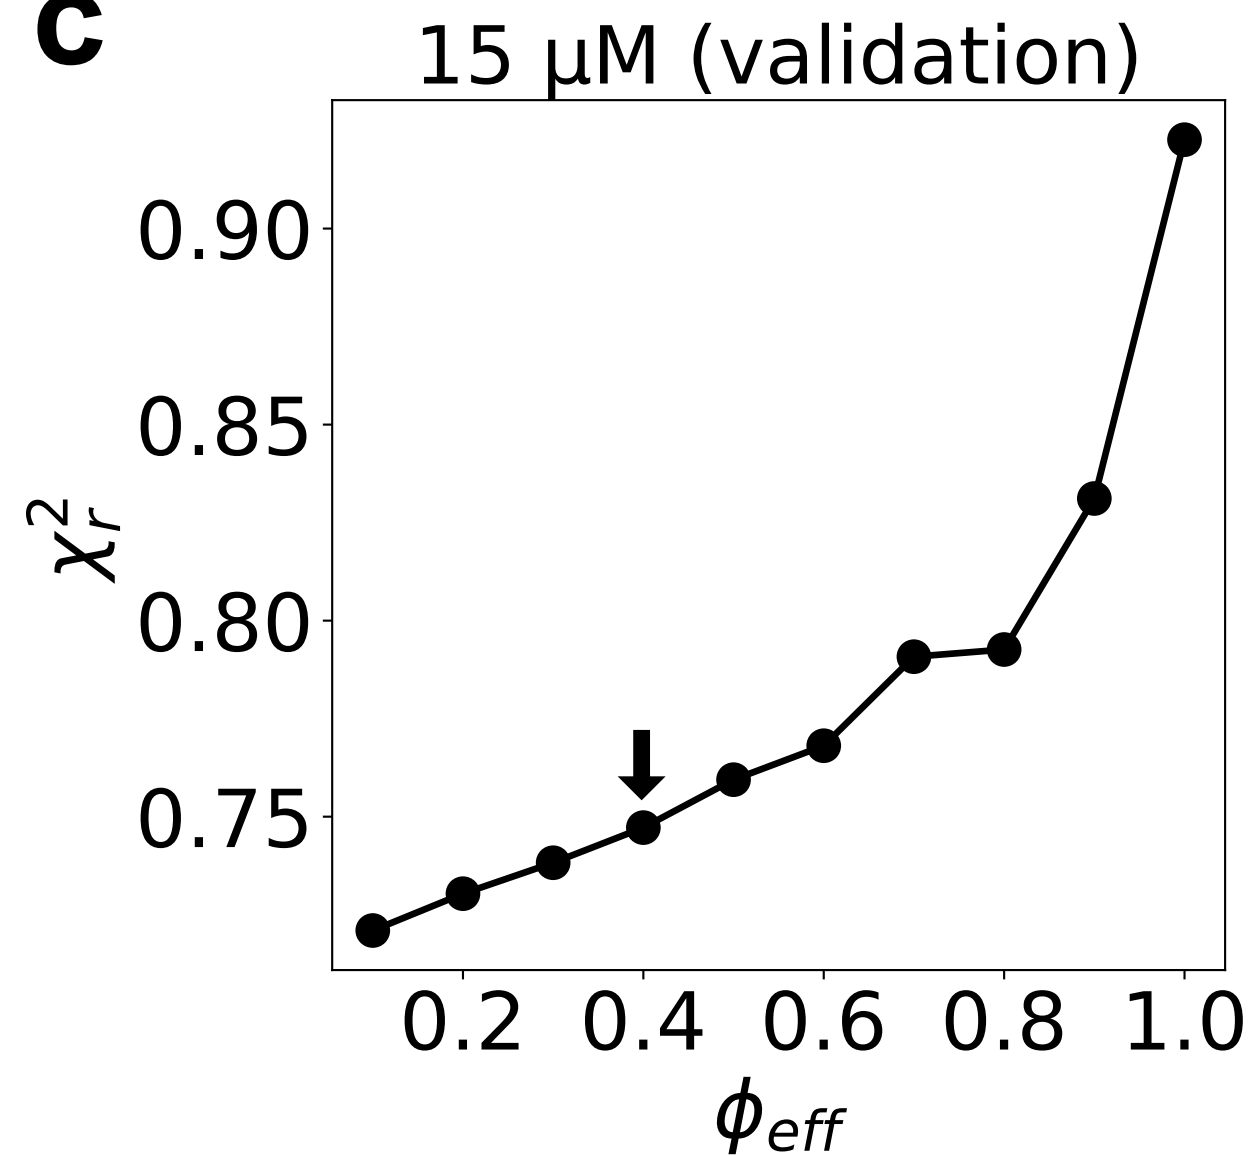**d**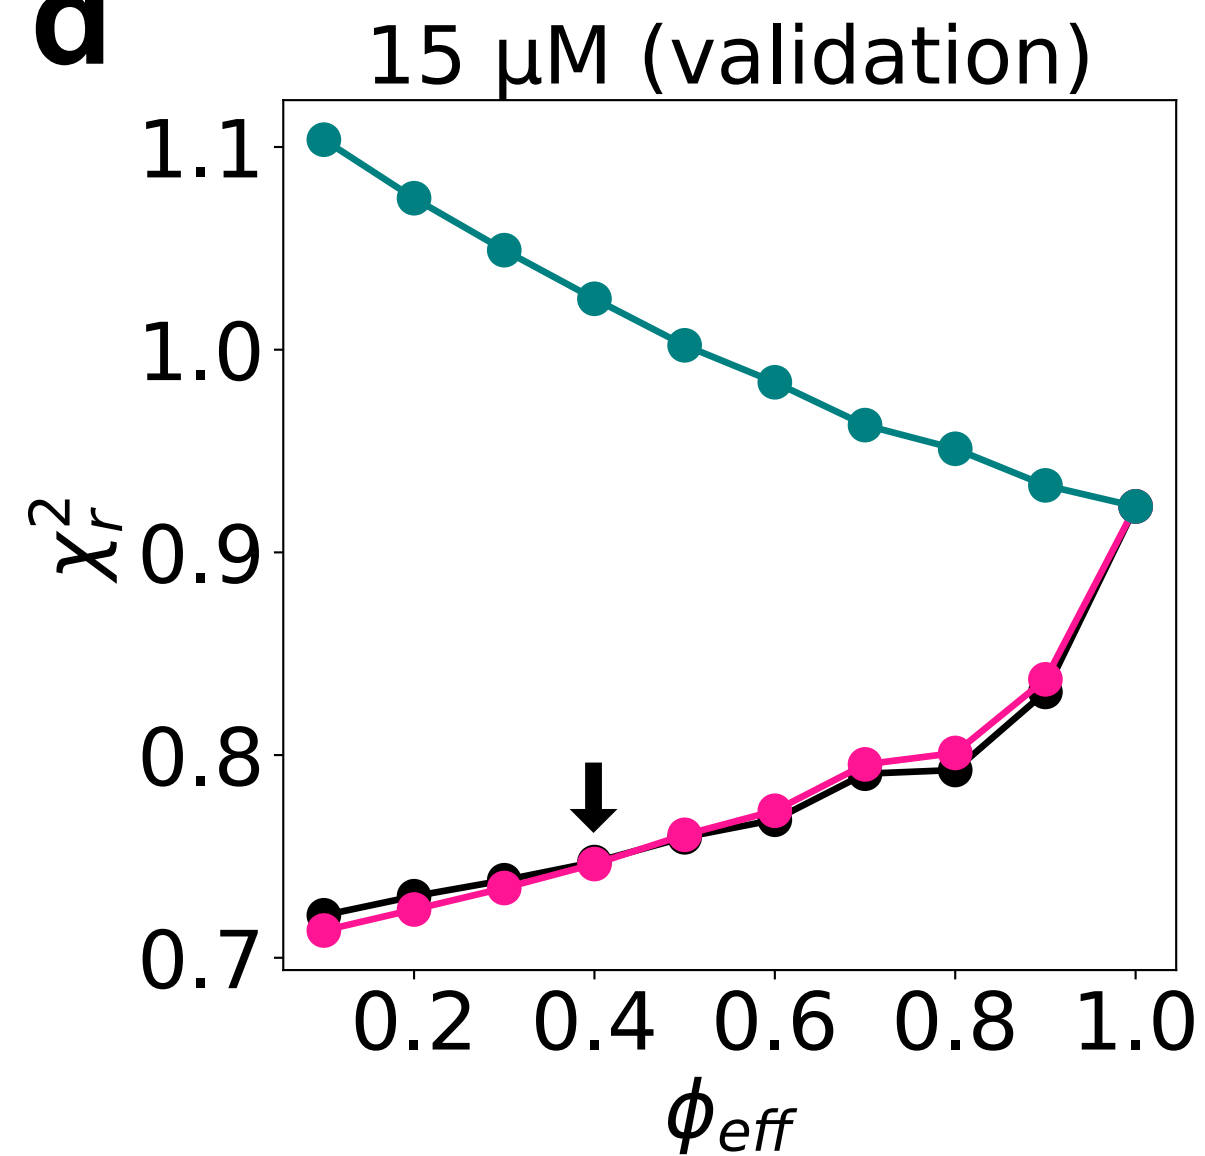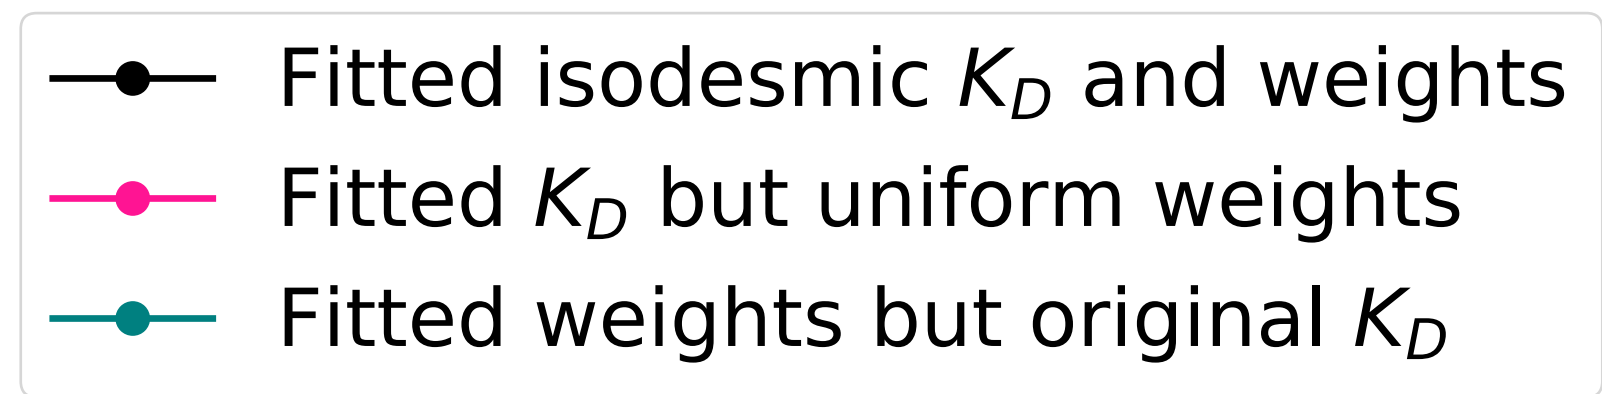

Supplement: supp [file elife-84147-supp-v1.zip]

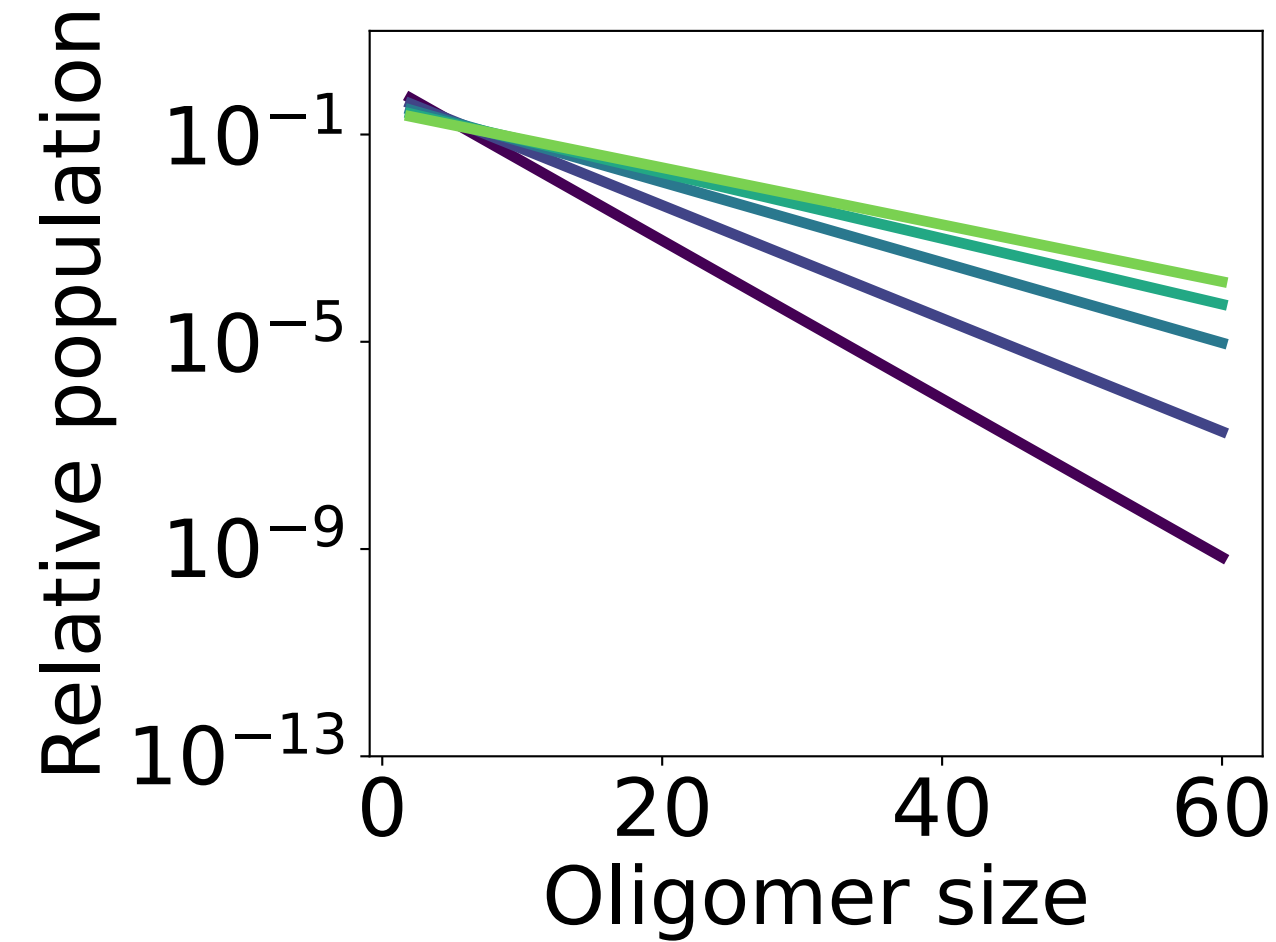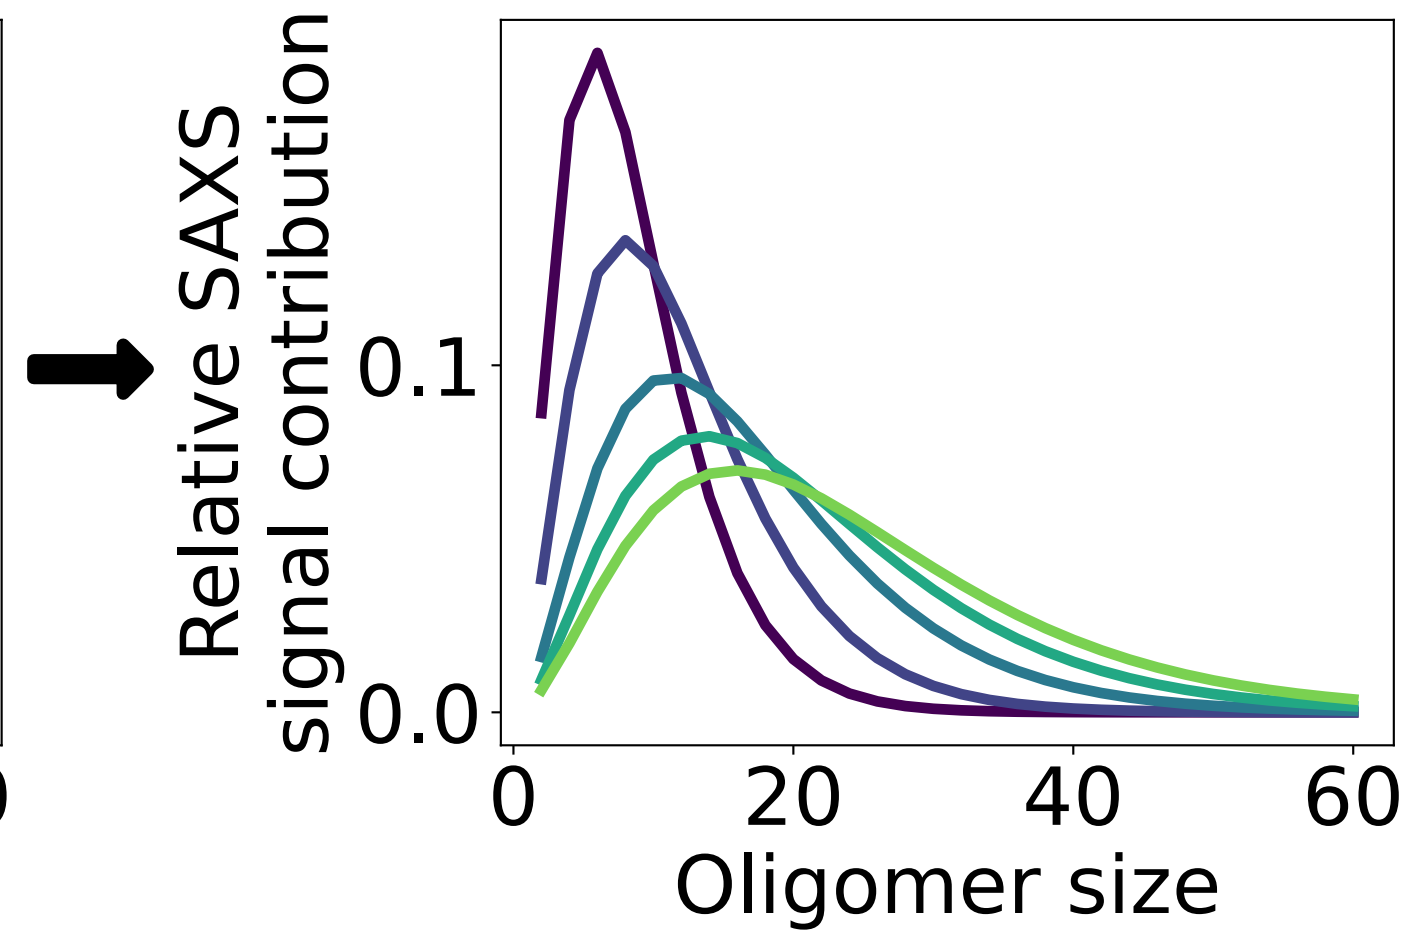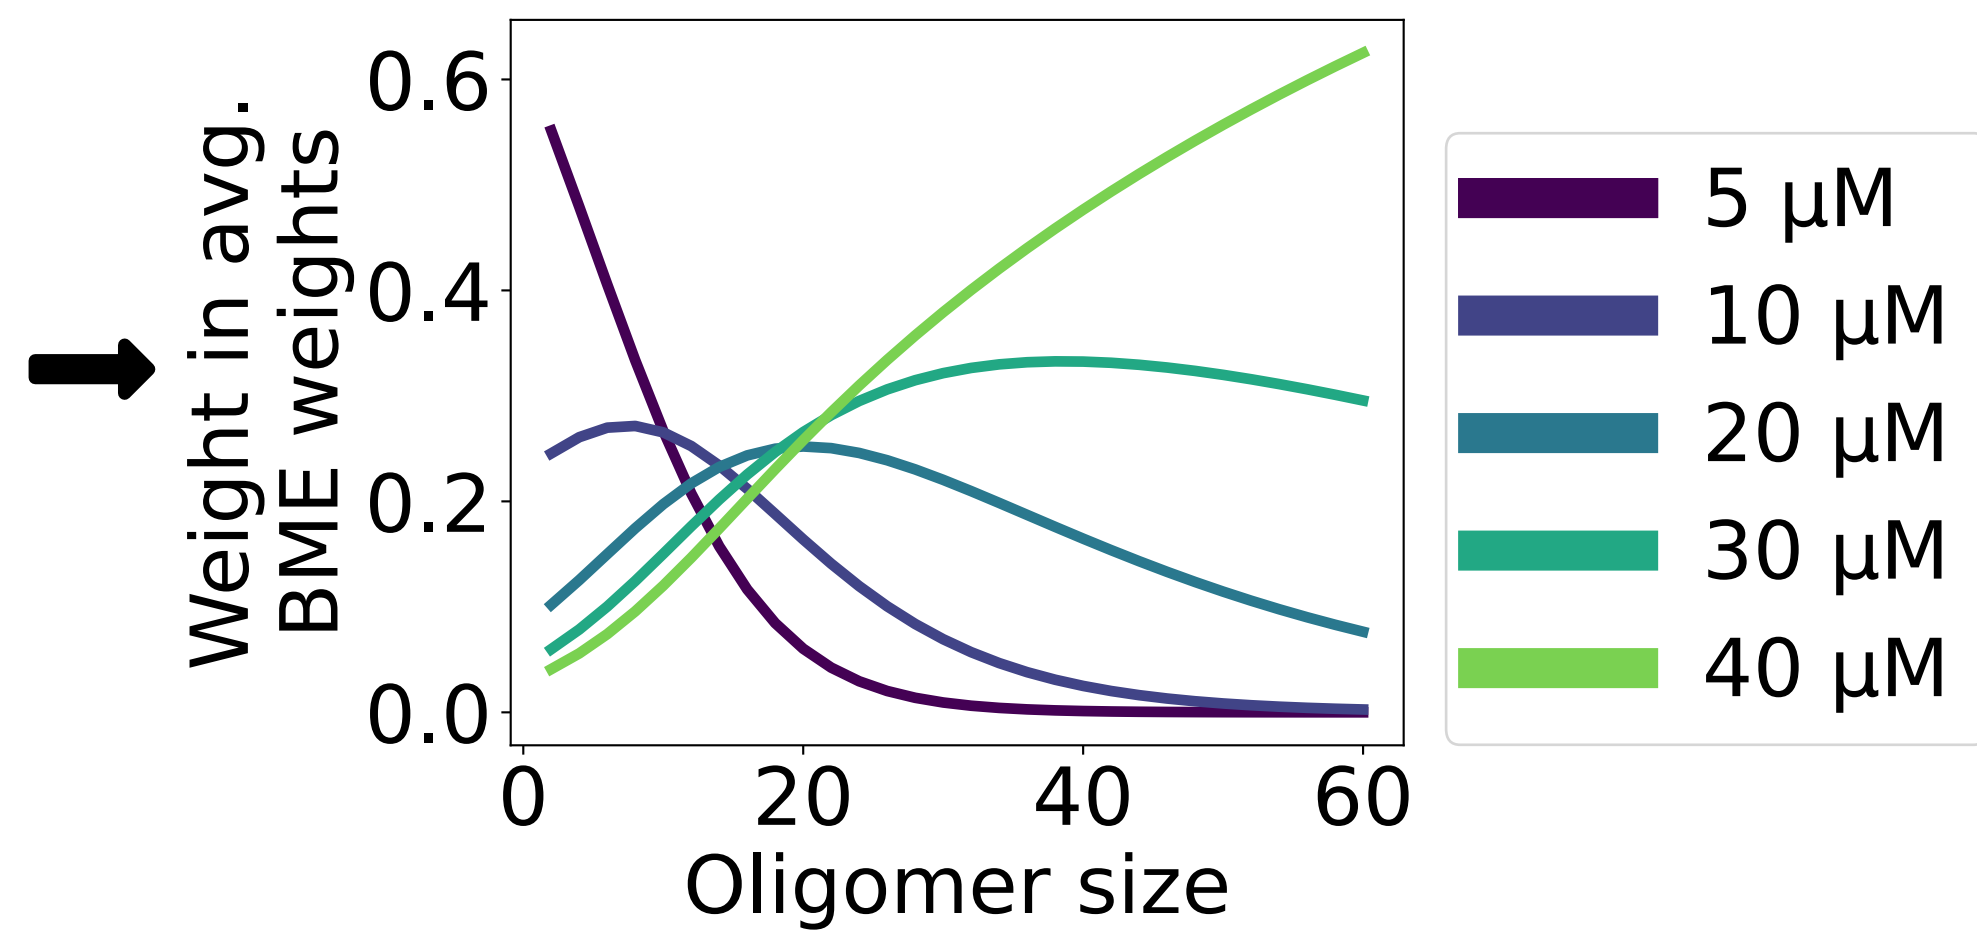

Supplement: supp [file elife-84147-supp-v1.zip]

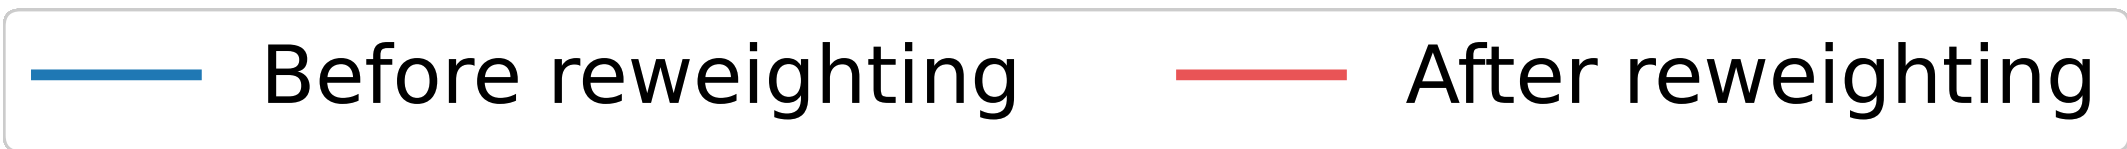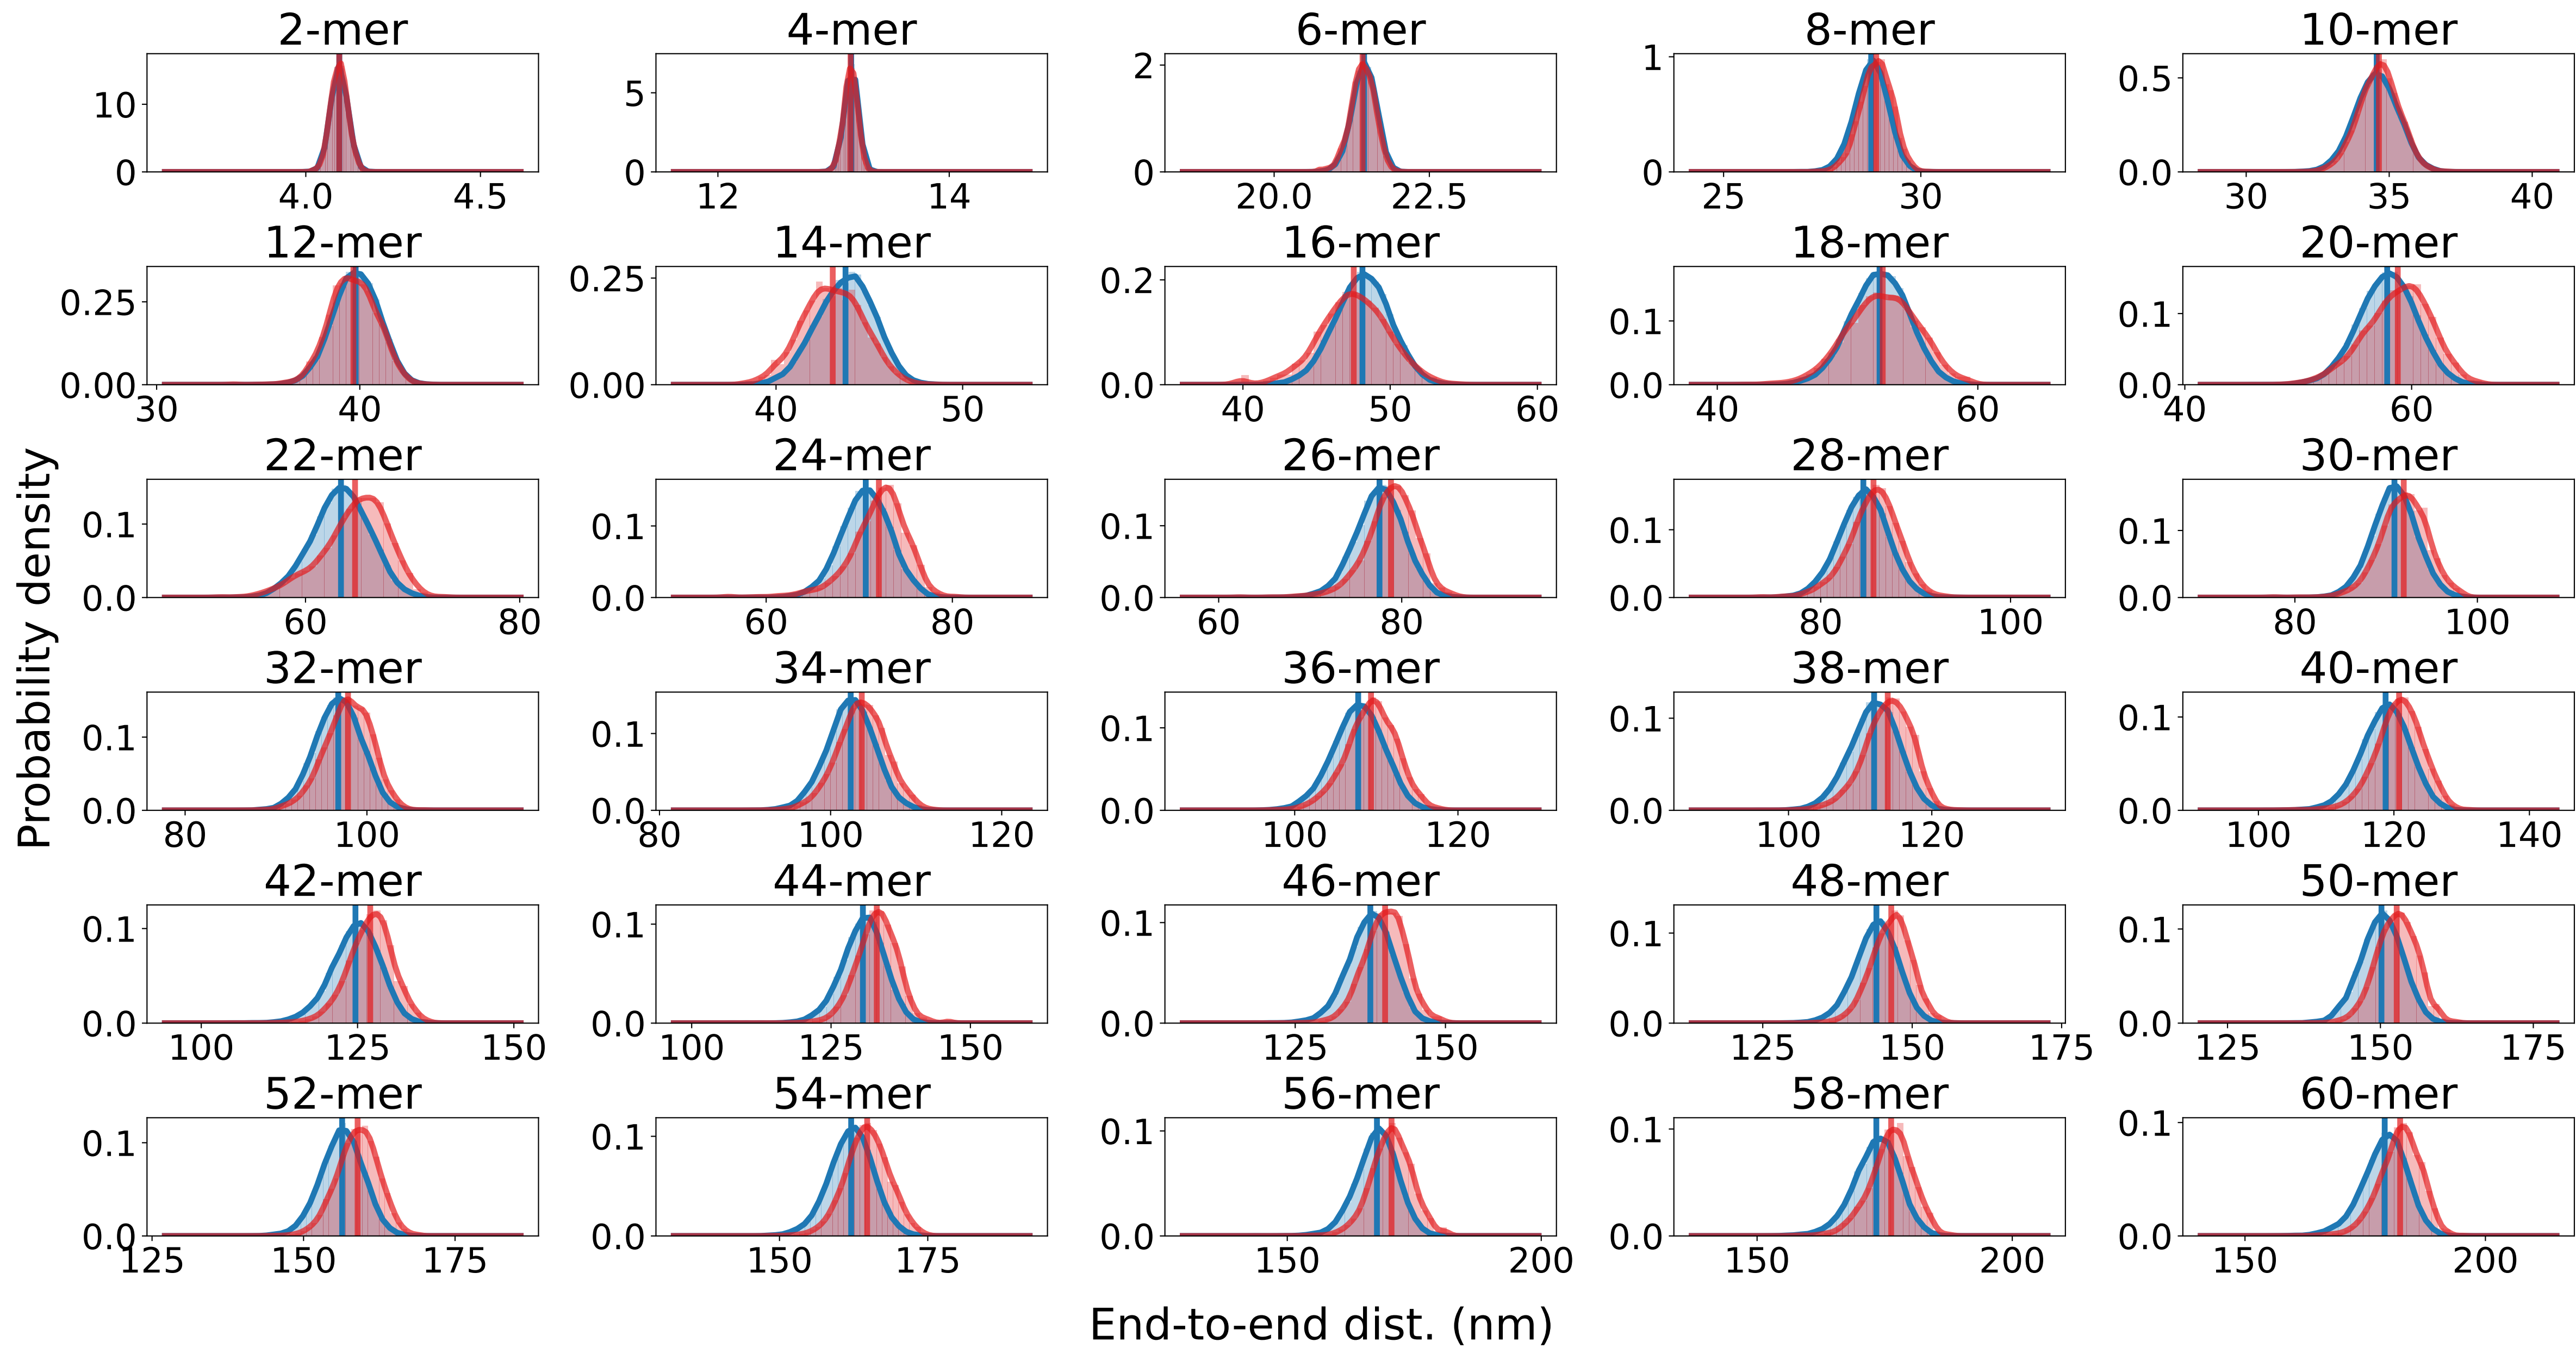

Supplement: supp [file elife-84147-supp-v1.zip]

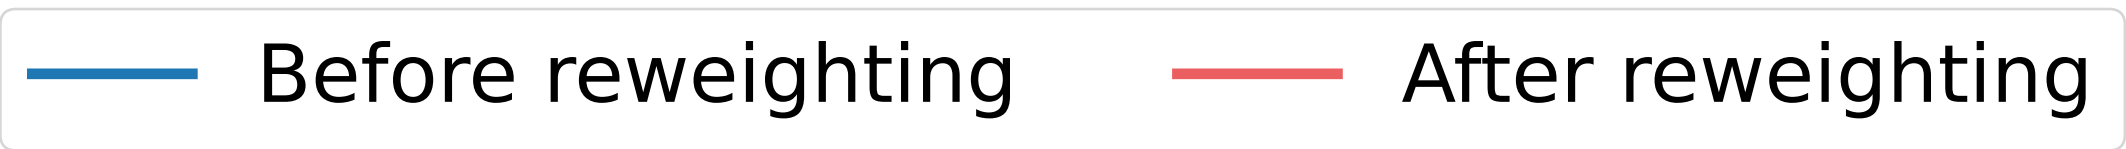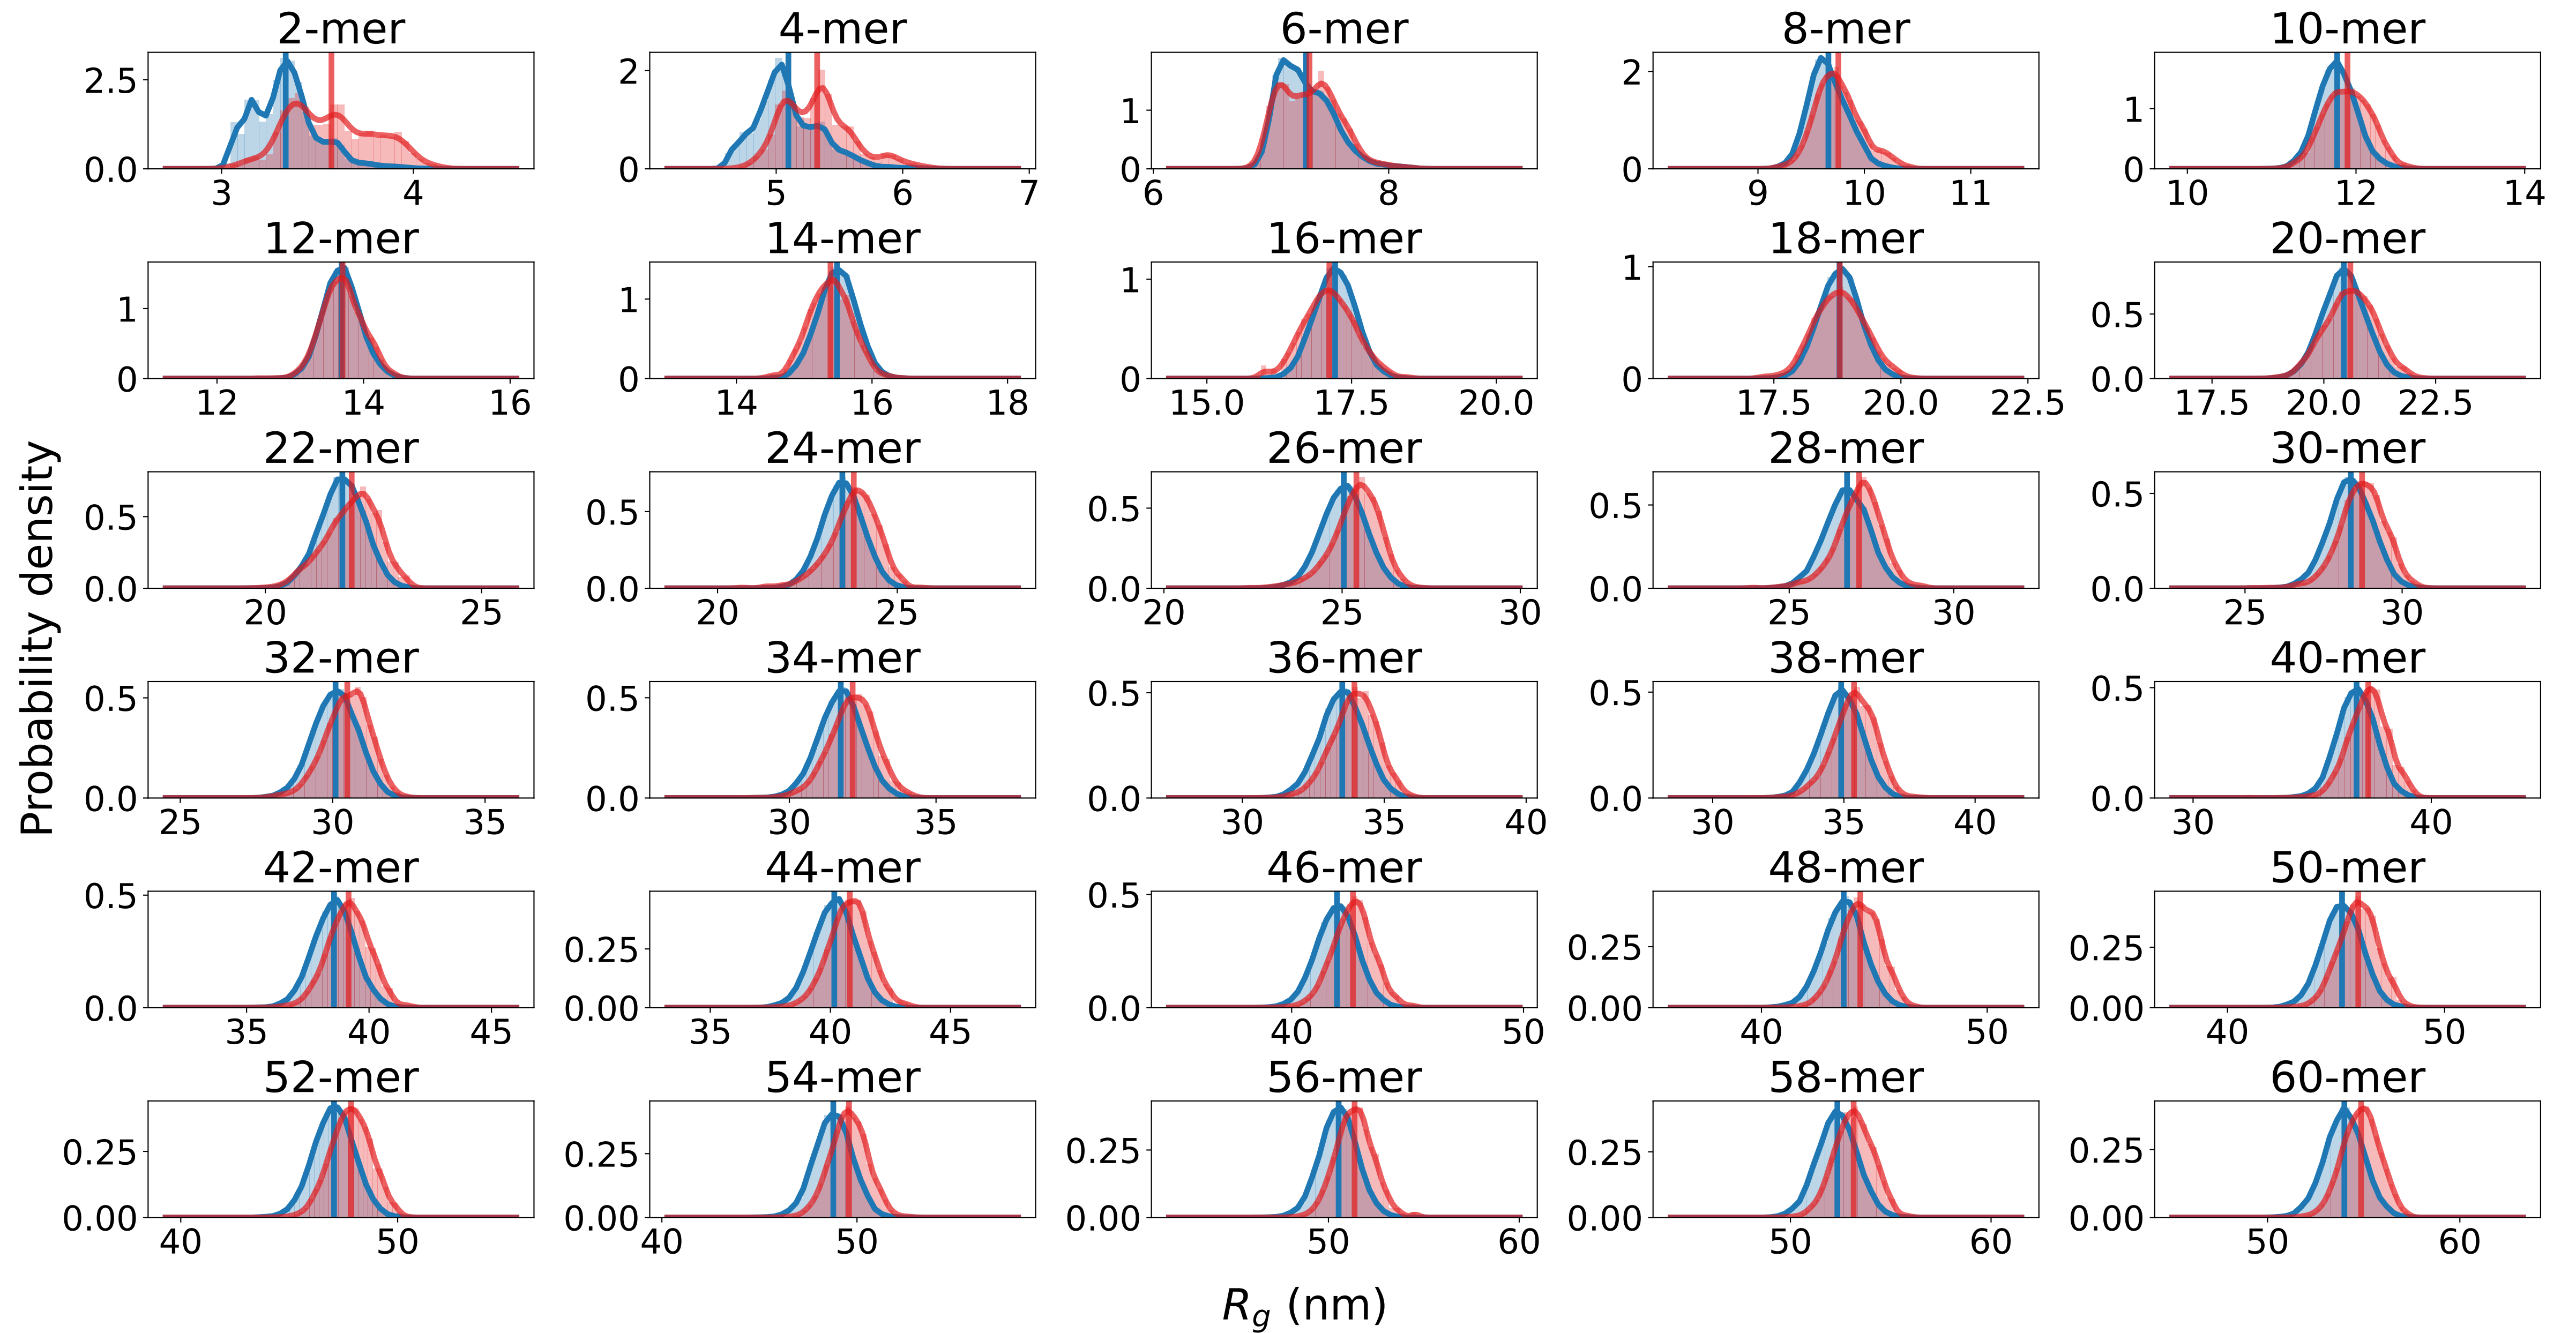

Supplement: supp [file elife-84147-supp-v1.zip]

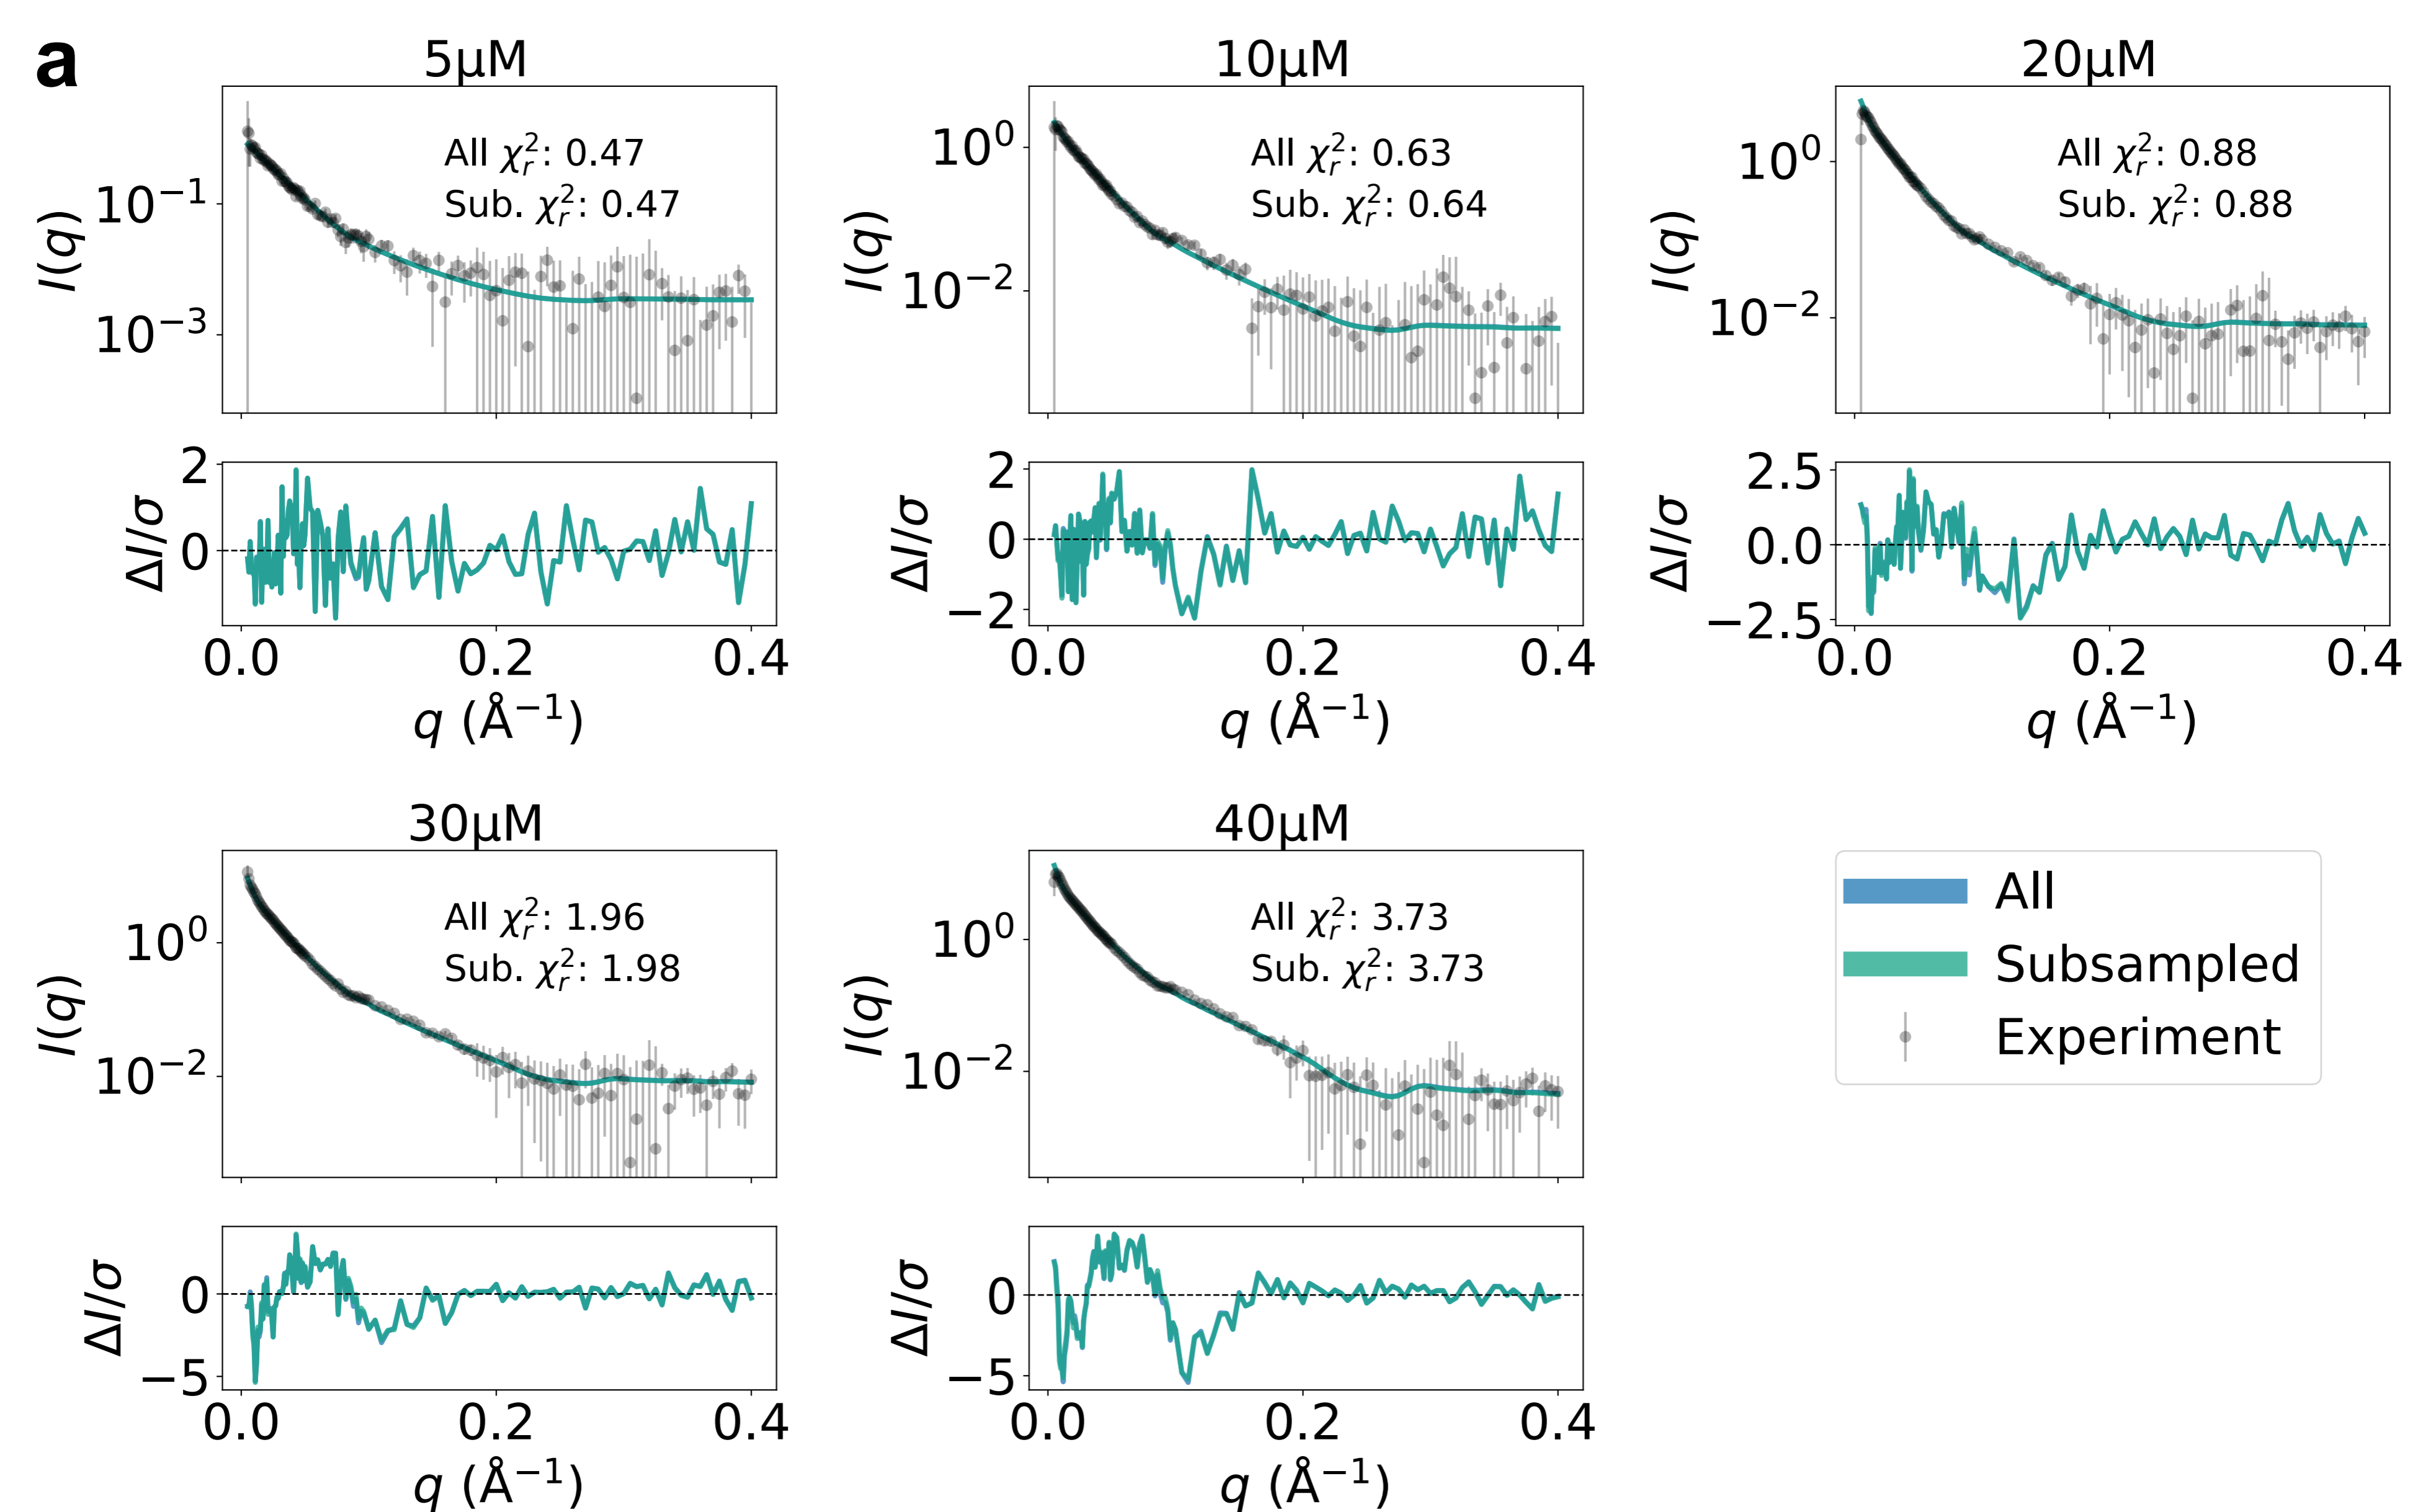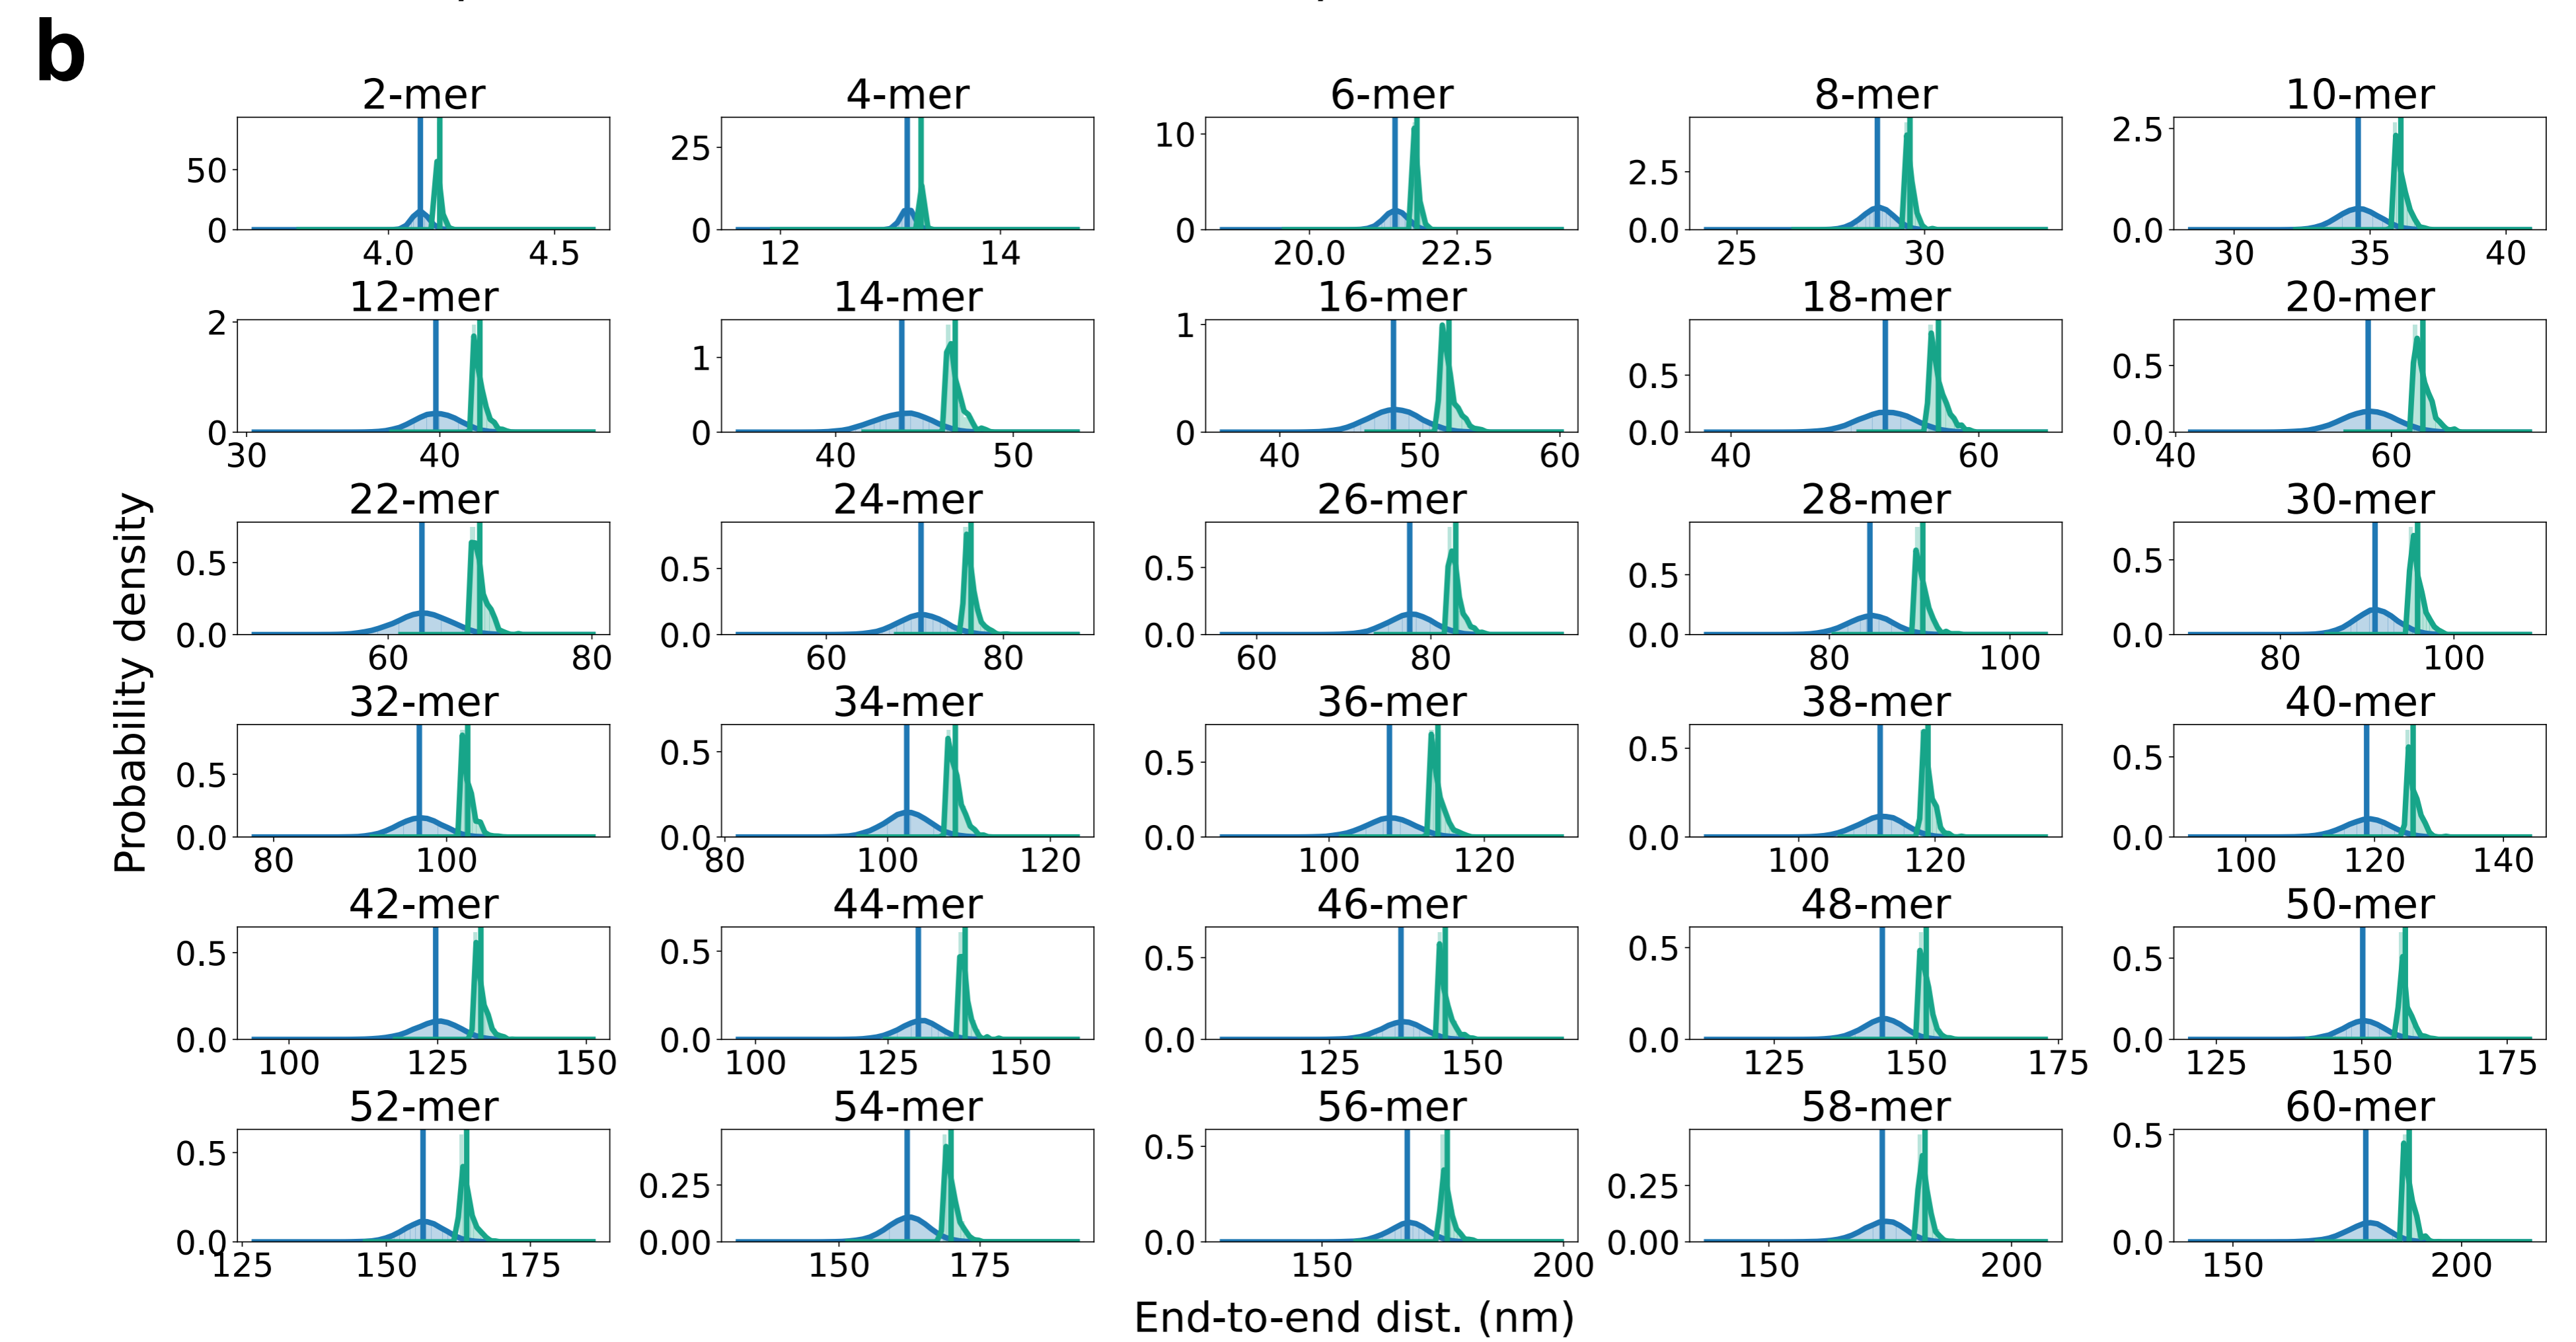

Supplement: supp [file elife-84147-supp-v1.zip]

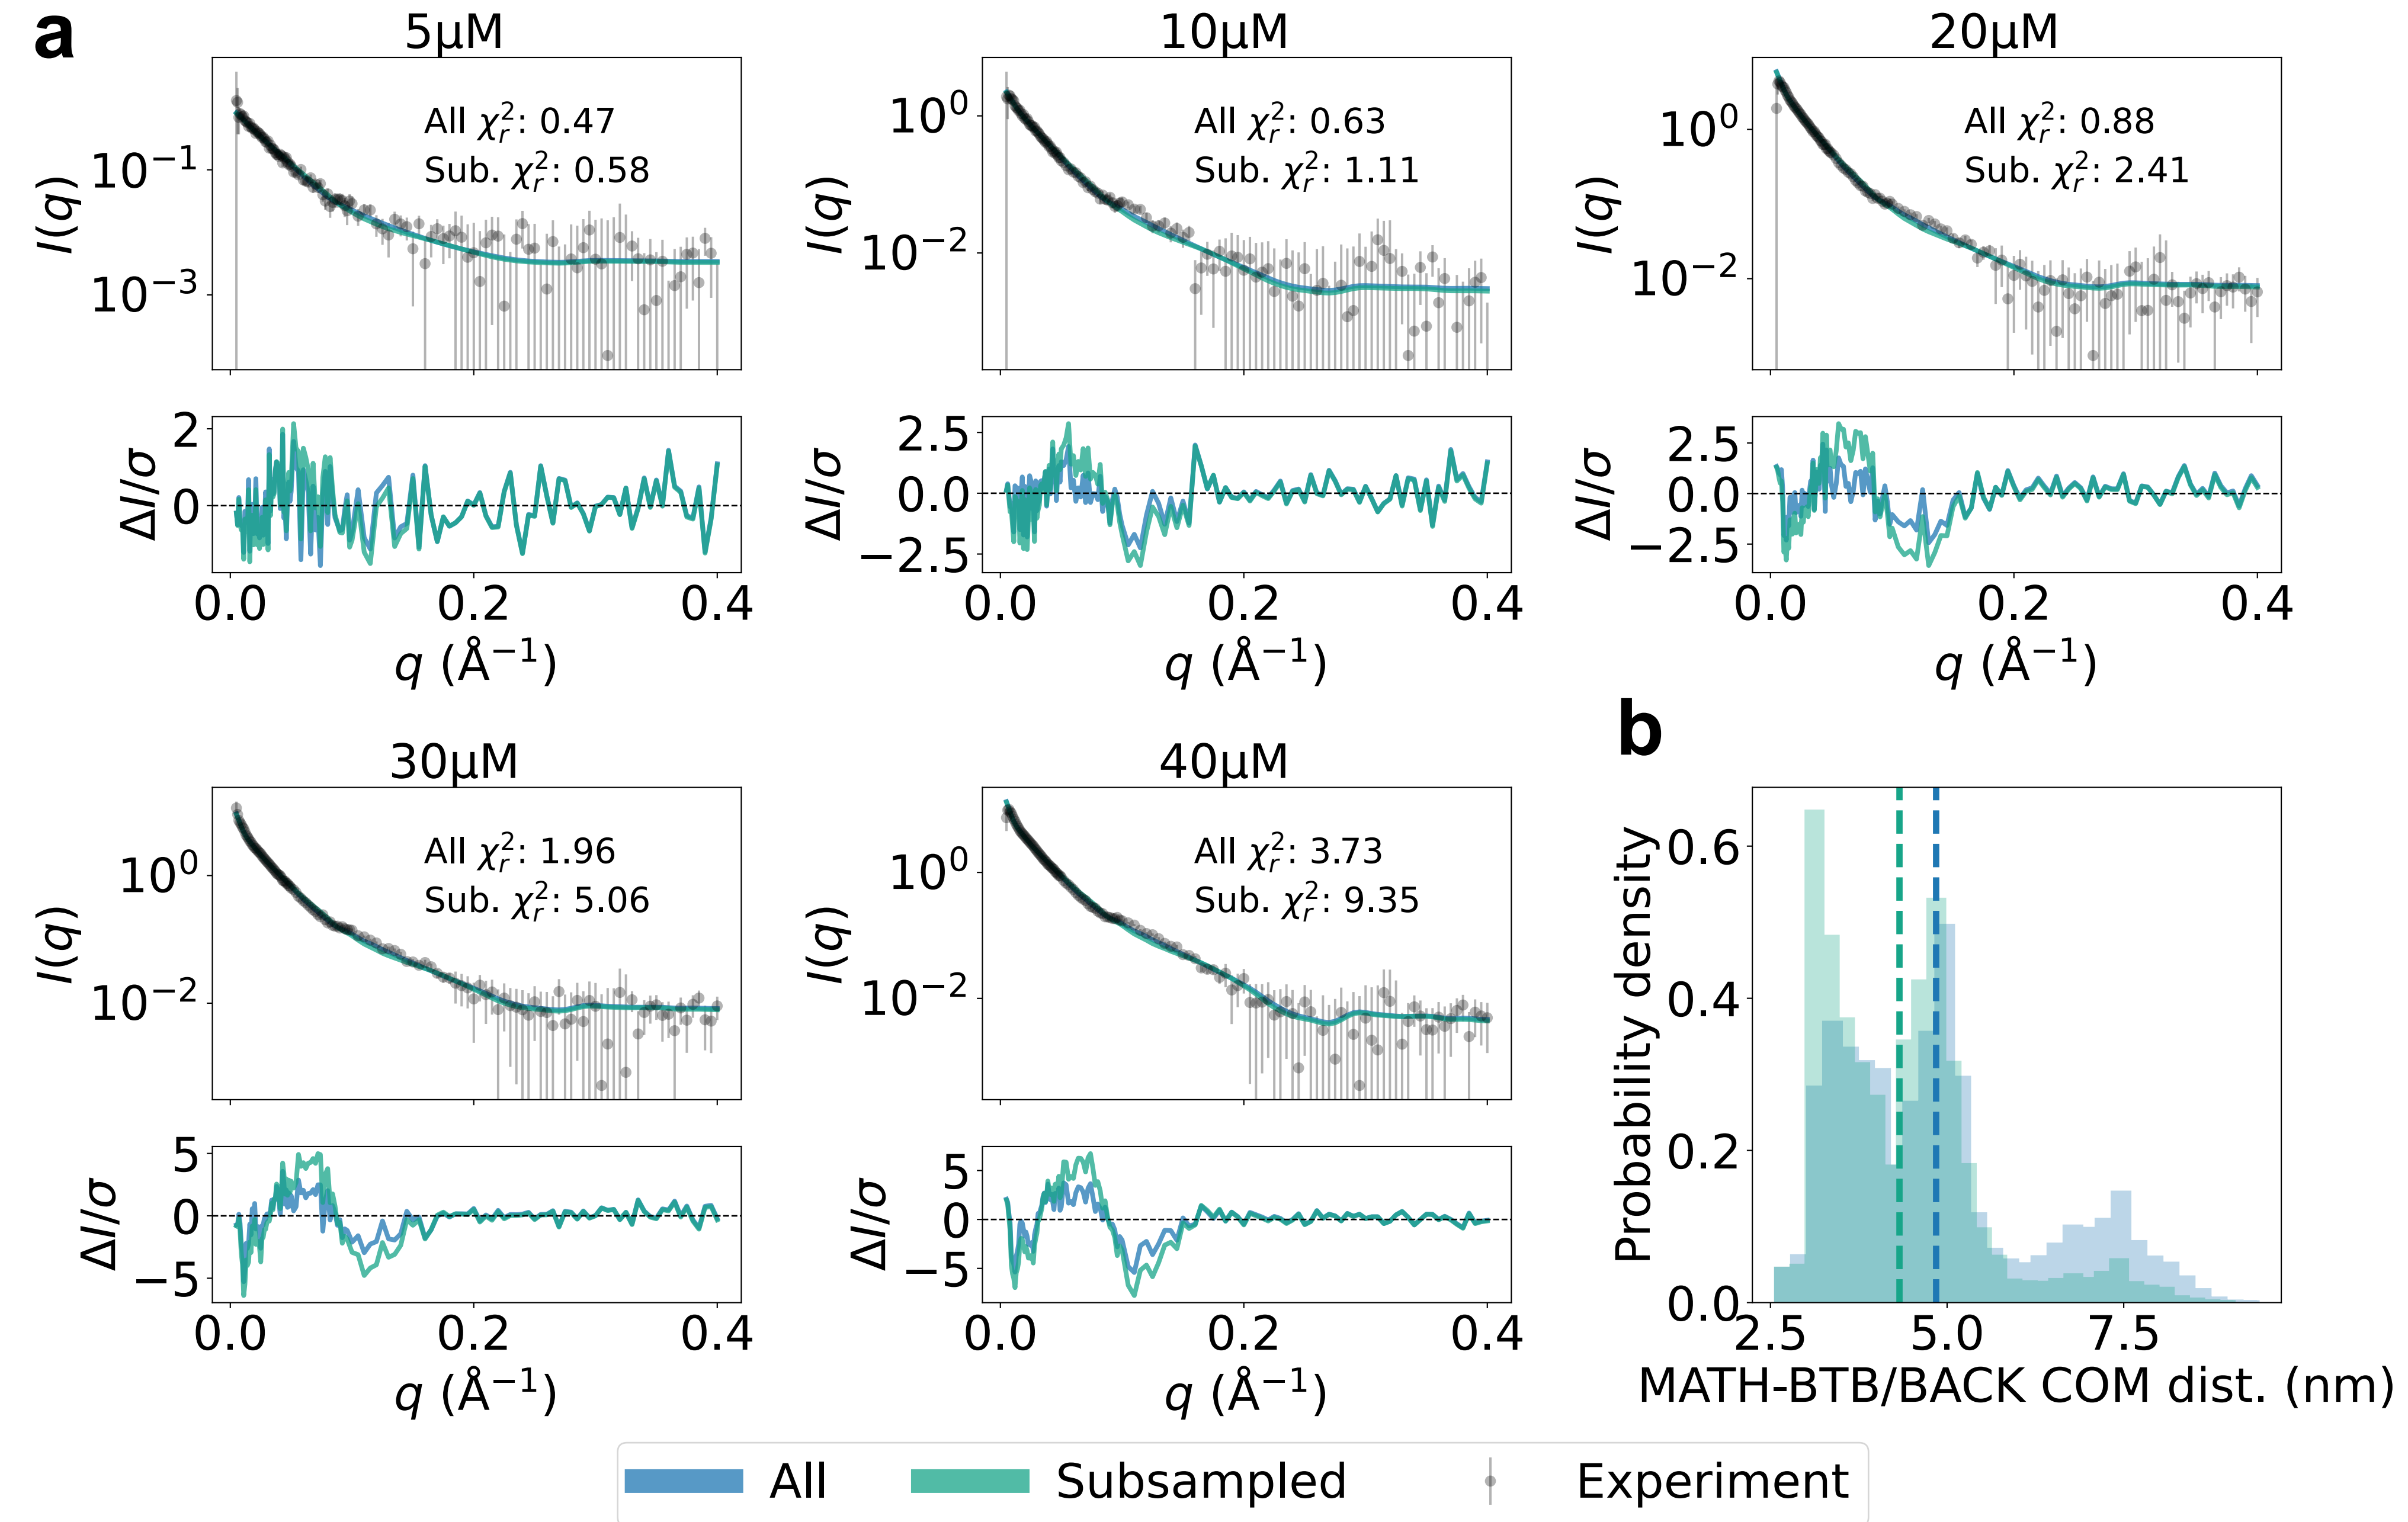

Supplement: supp [file elife-84147-supp-v1.zip]

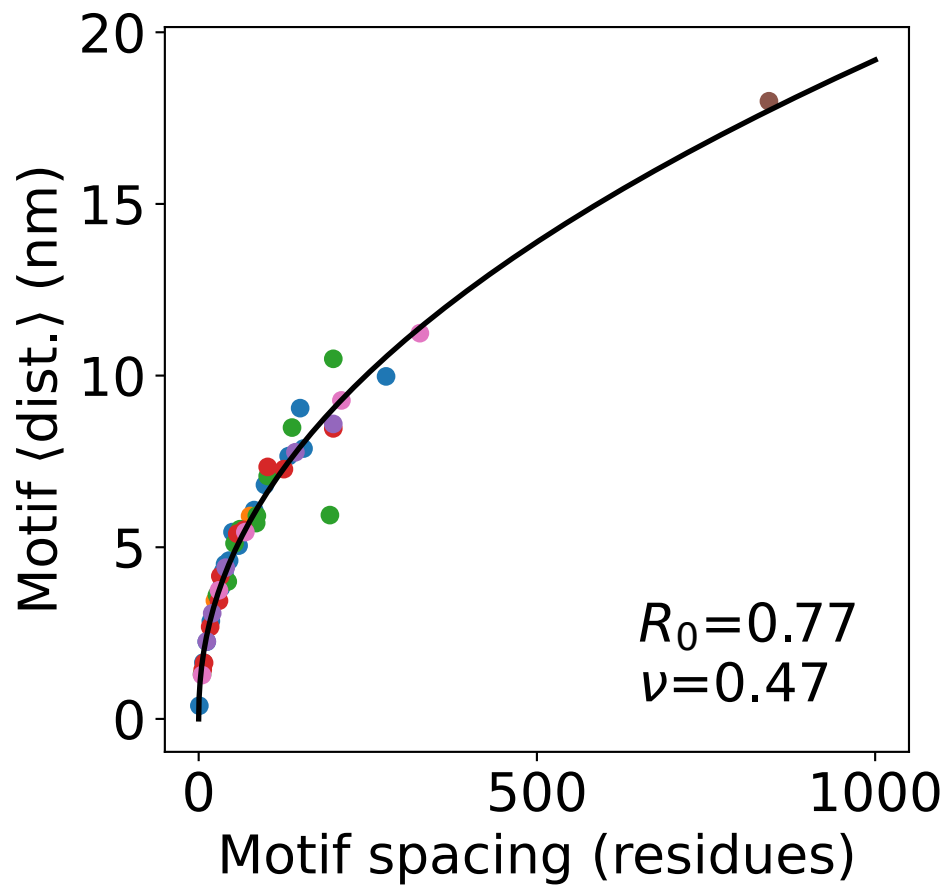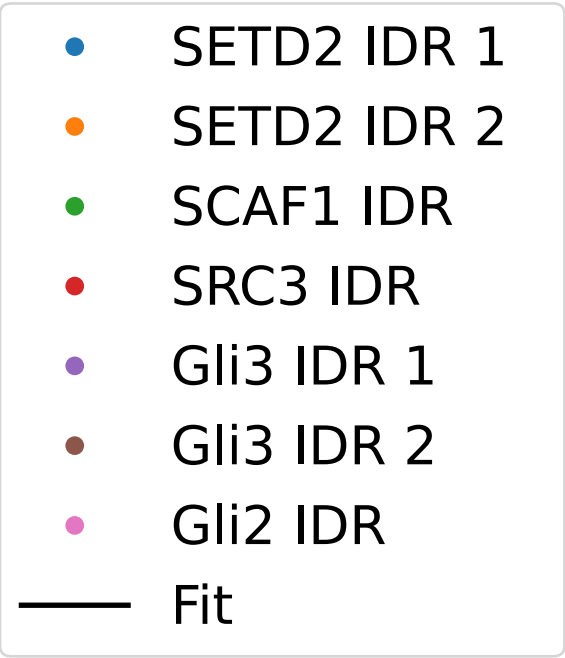

Supplement: supp [file elife-84147-supp-v1.zip]

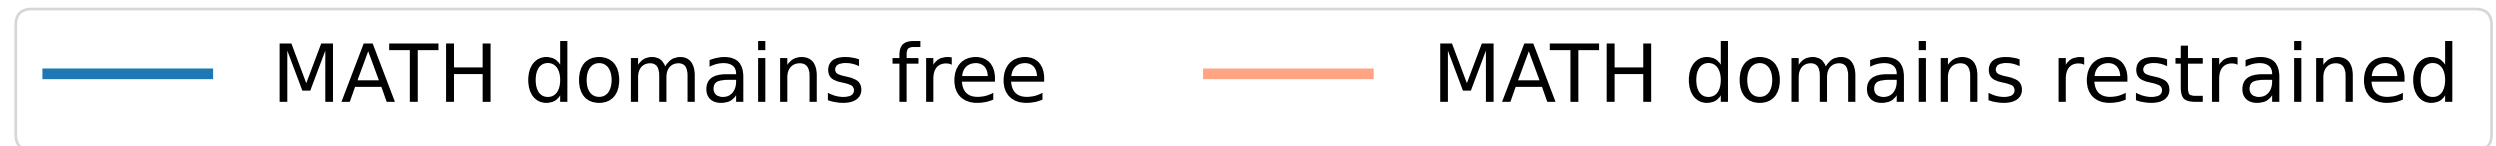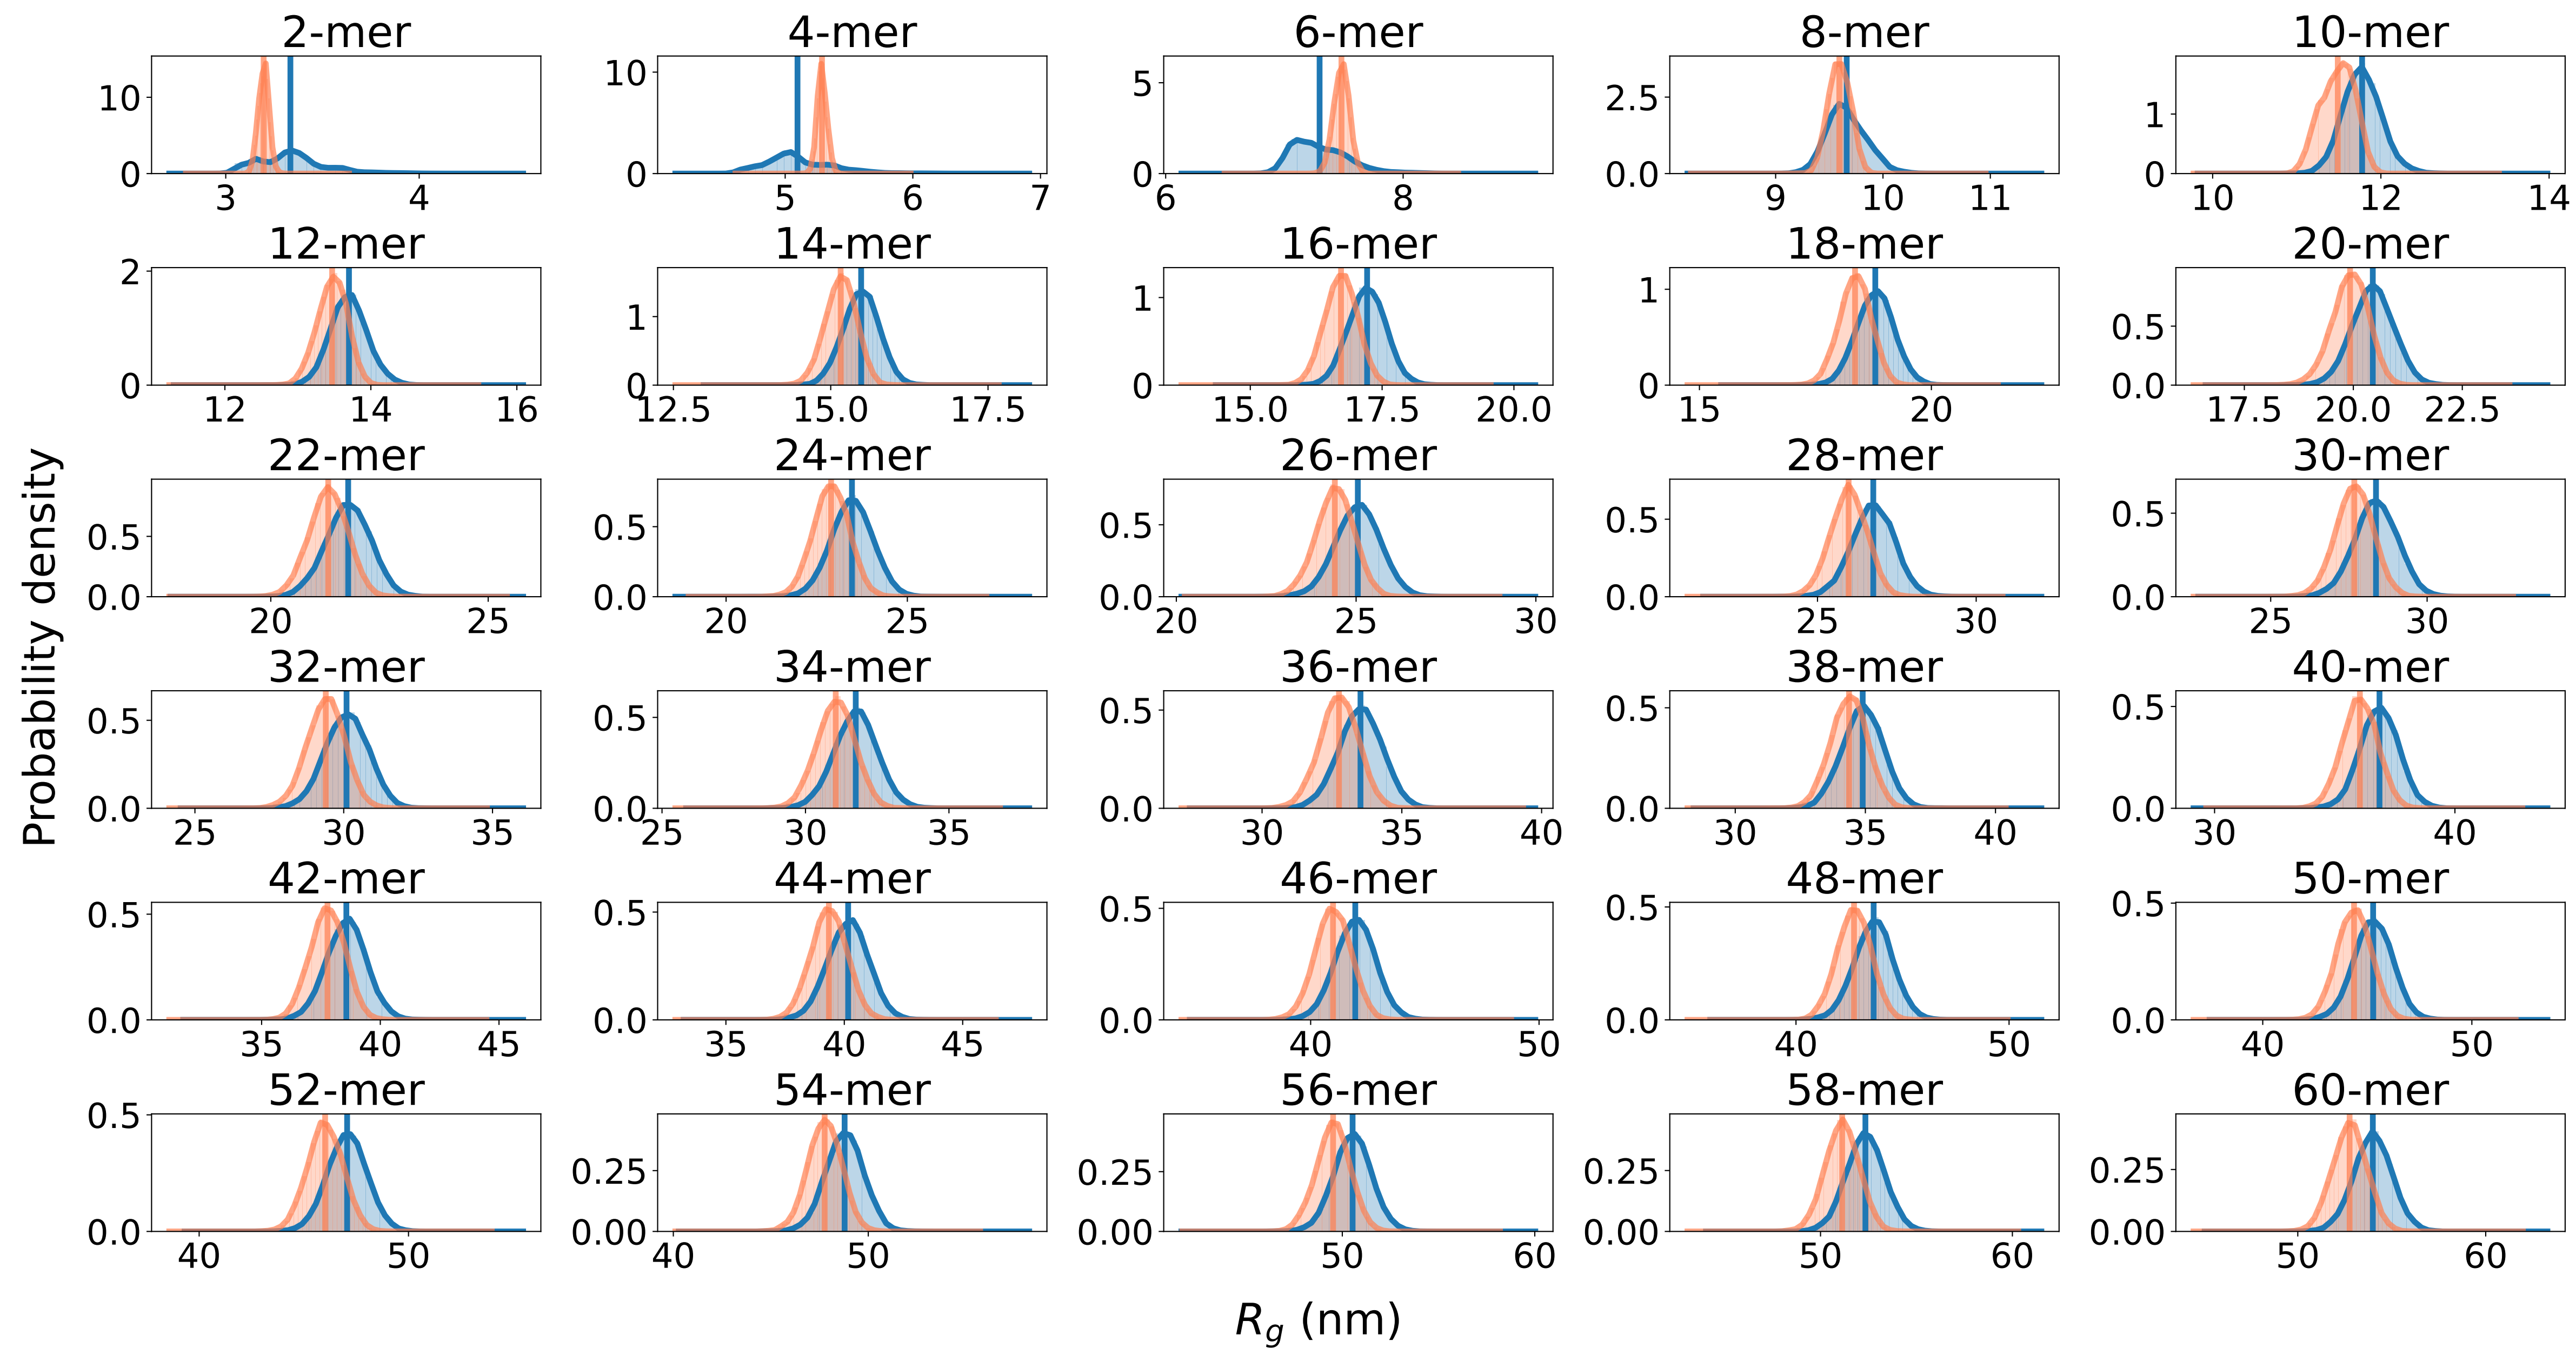

Supplement: supp [file elife-84147-supp-v1.zip]

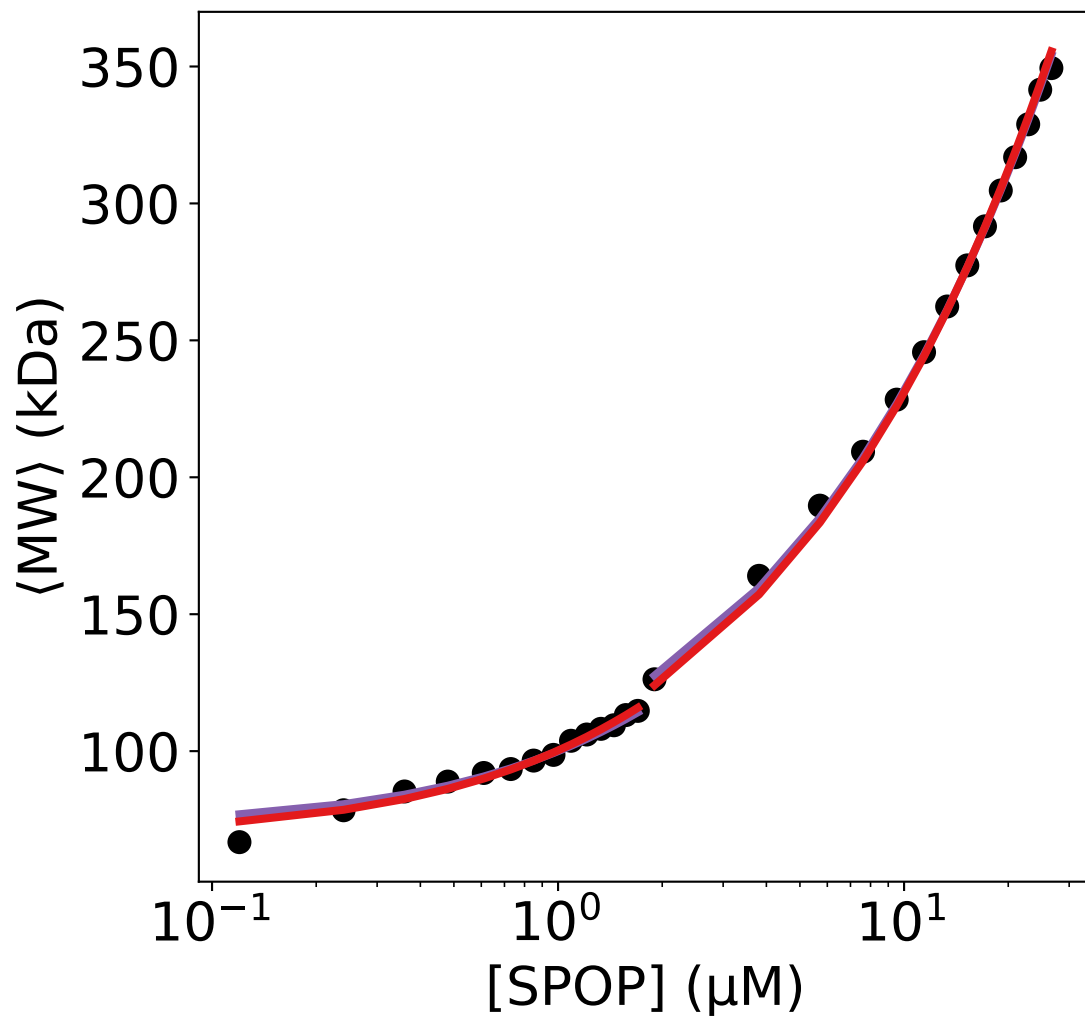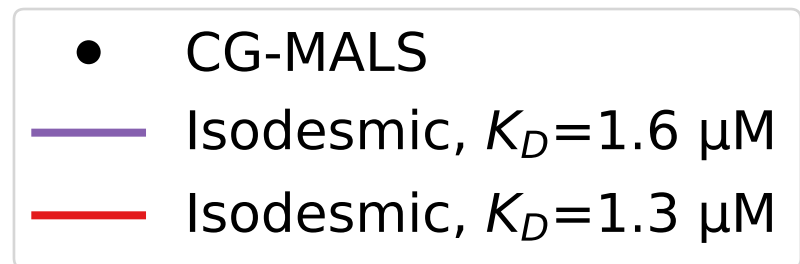

Supplement: supp [file elife-84147-supp-v1.zip]

R221C, MATH domains free  
before reweighting

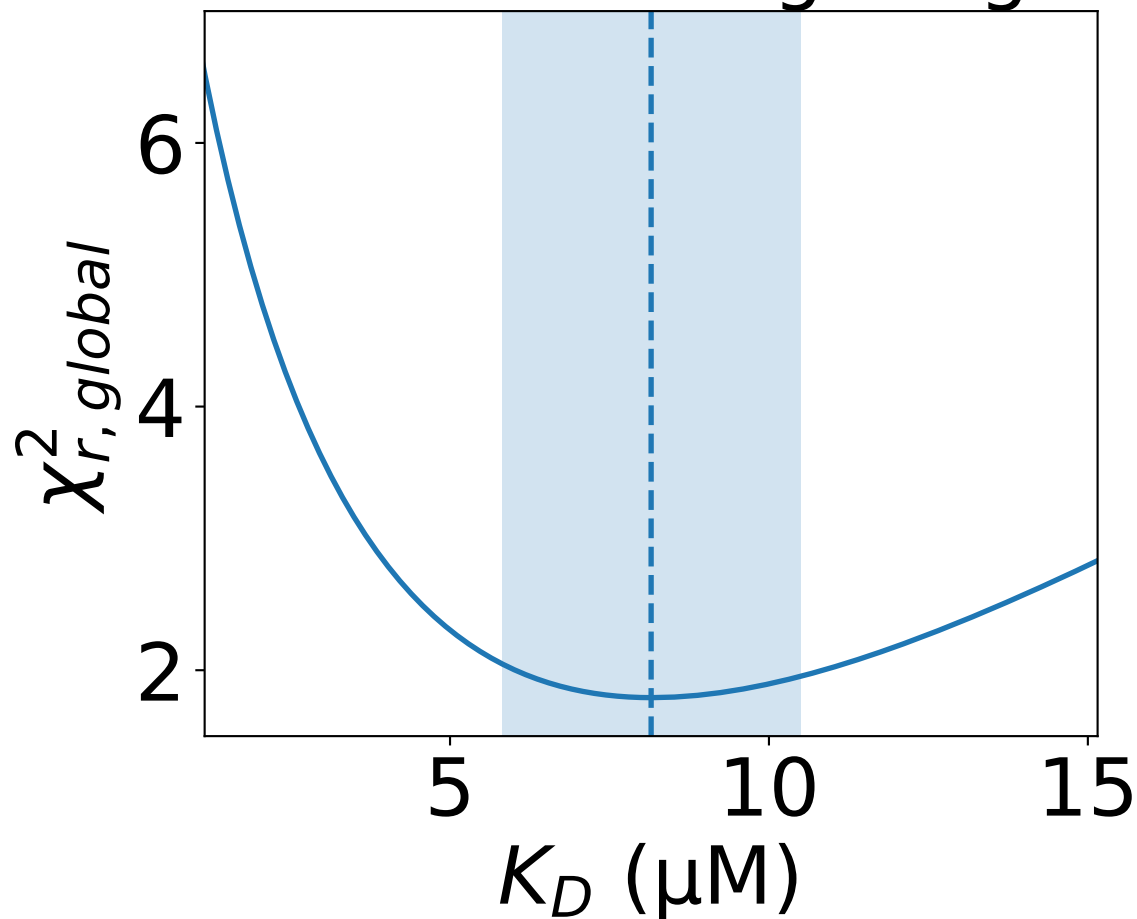

Supplement: supp [file elife-84147-supp-v1.zip]

WT, MATH domains restrained  
before reweighting

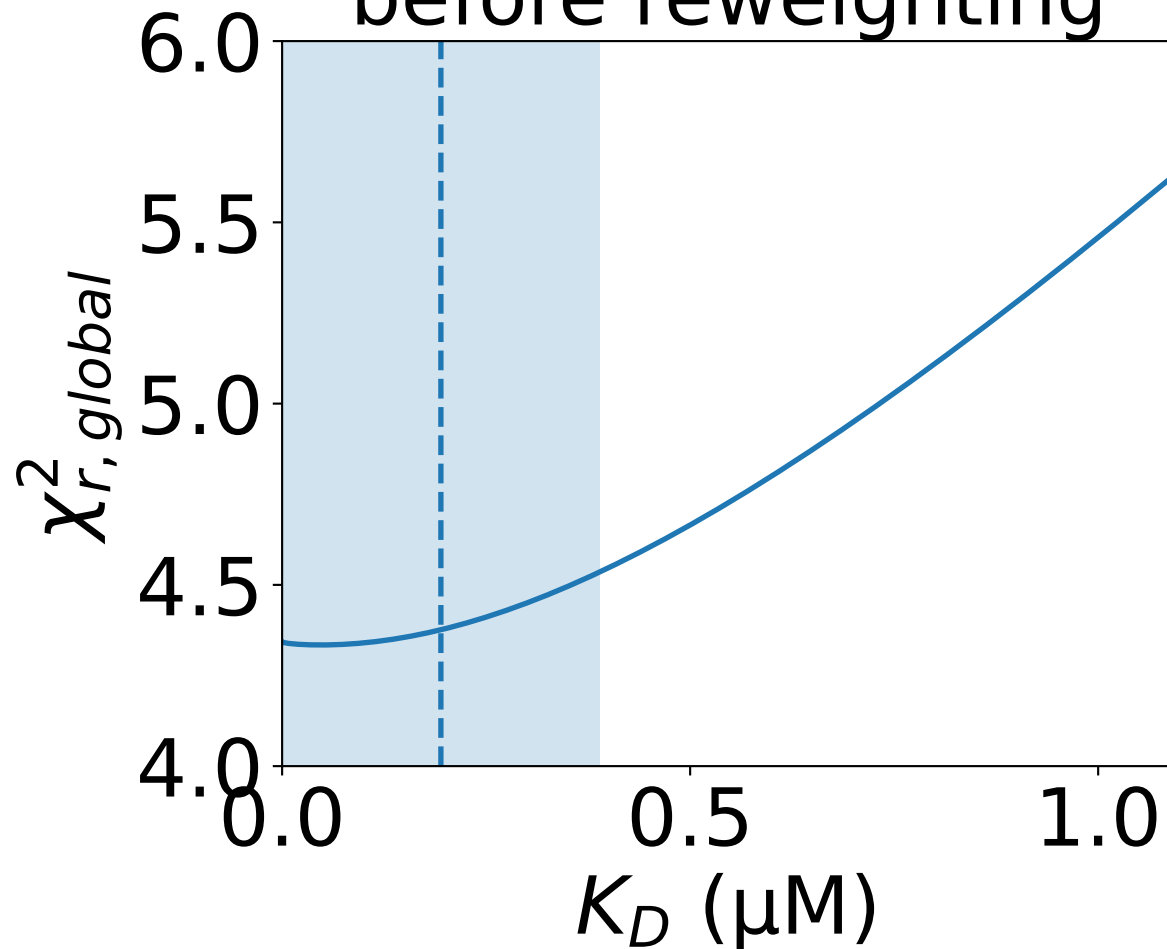

Supplement: supp [file elife-84147-supp-v1.zip]

WT, MATH domains free  
reweighting with  $\phi_{eff}=0.4$

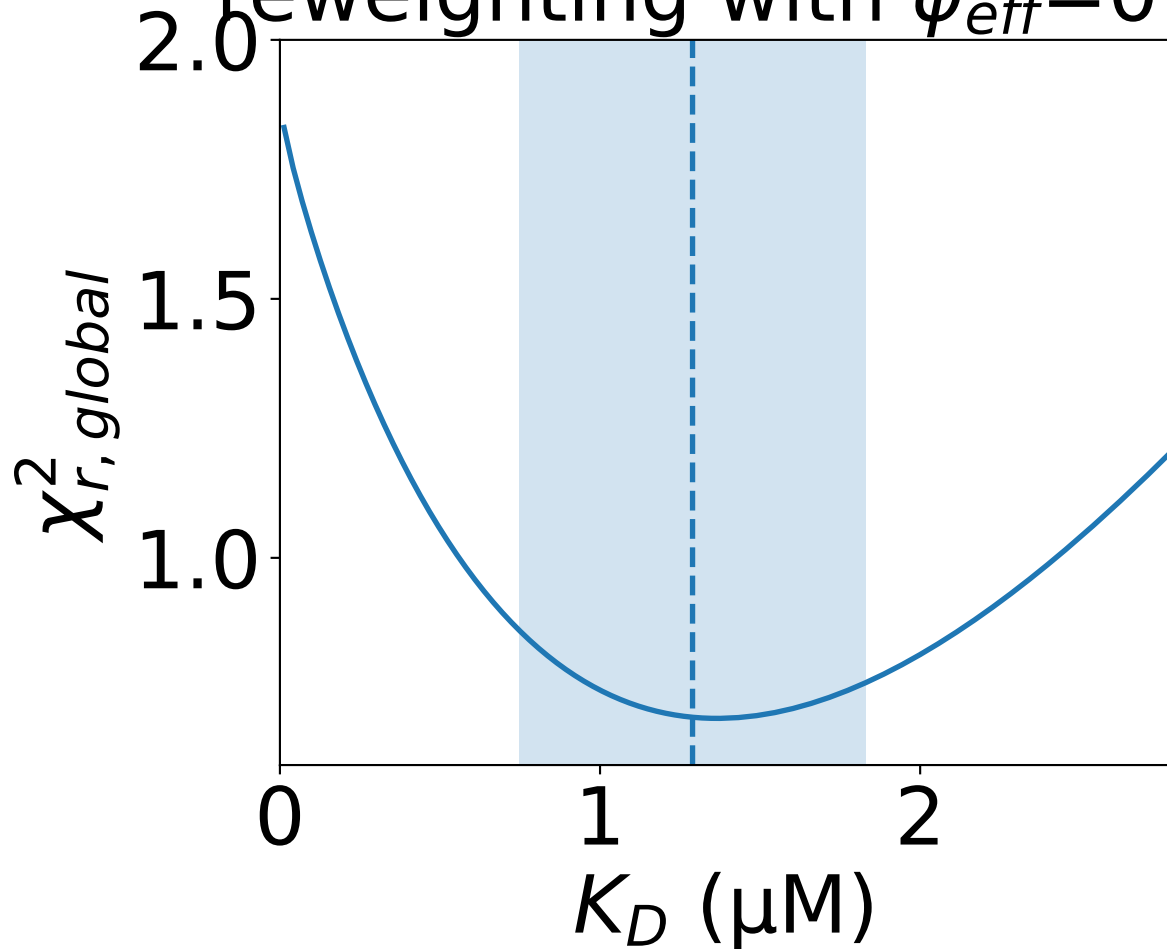

Supplement: supp [file elife-84147-supp-v1.zip]

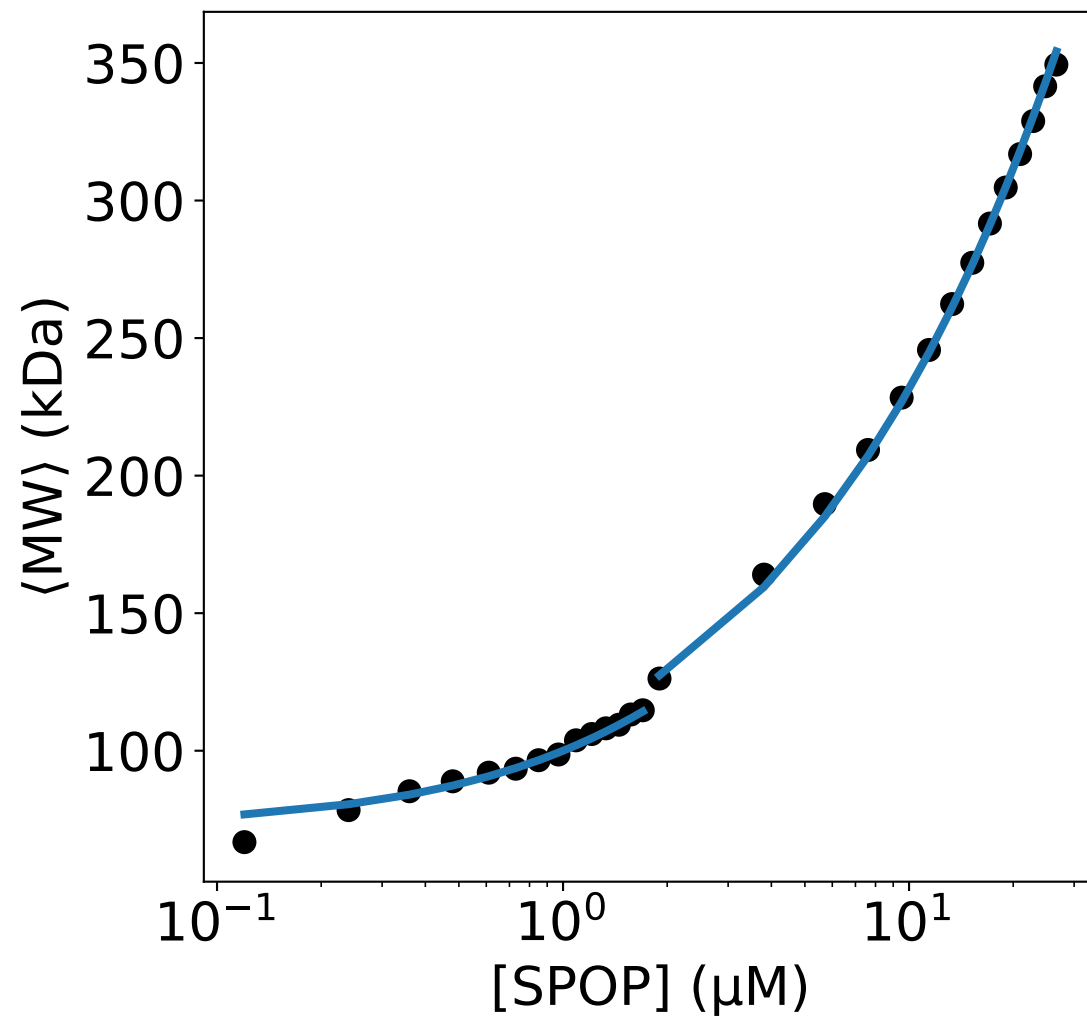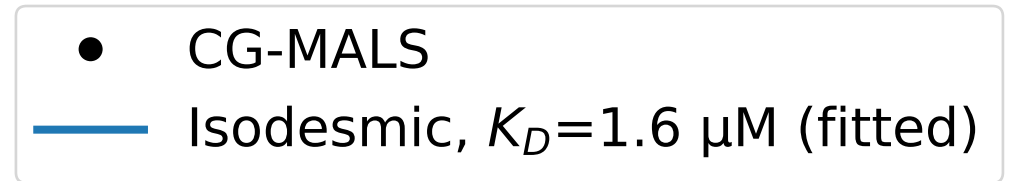

Supplement: supp [file elife-84147-supp-v1.zip]

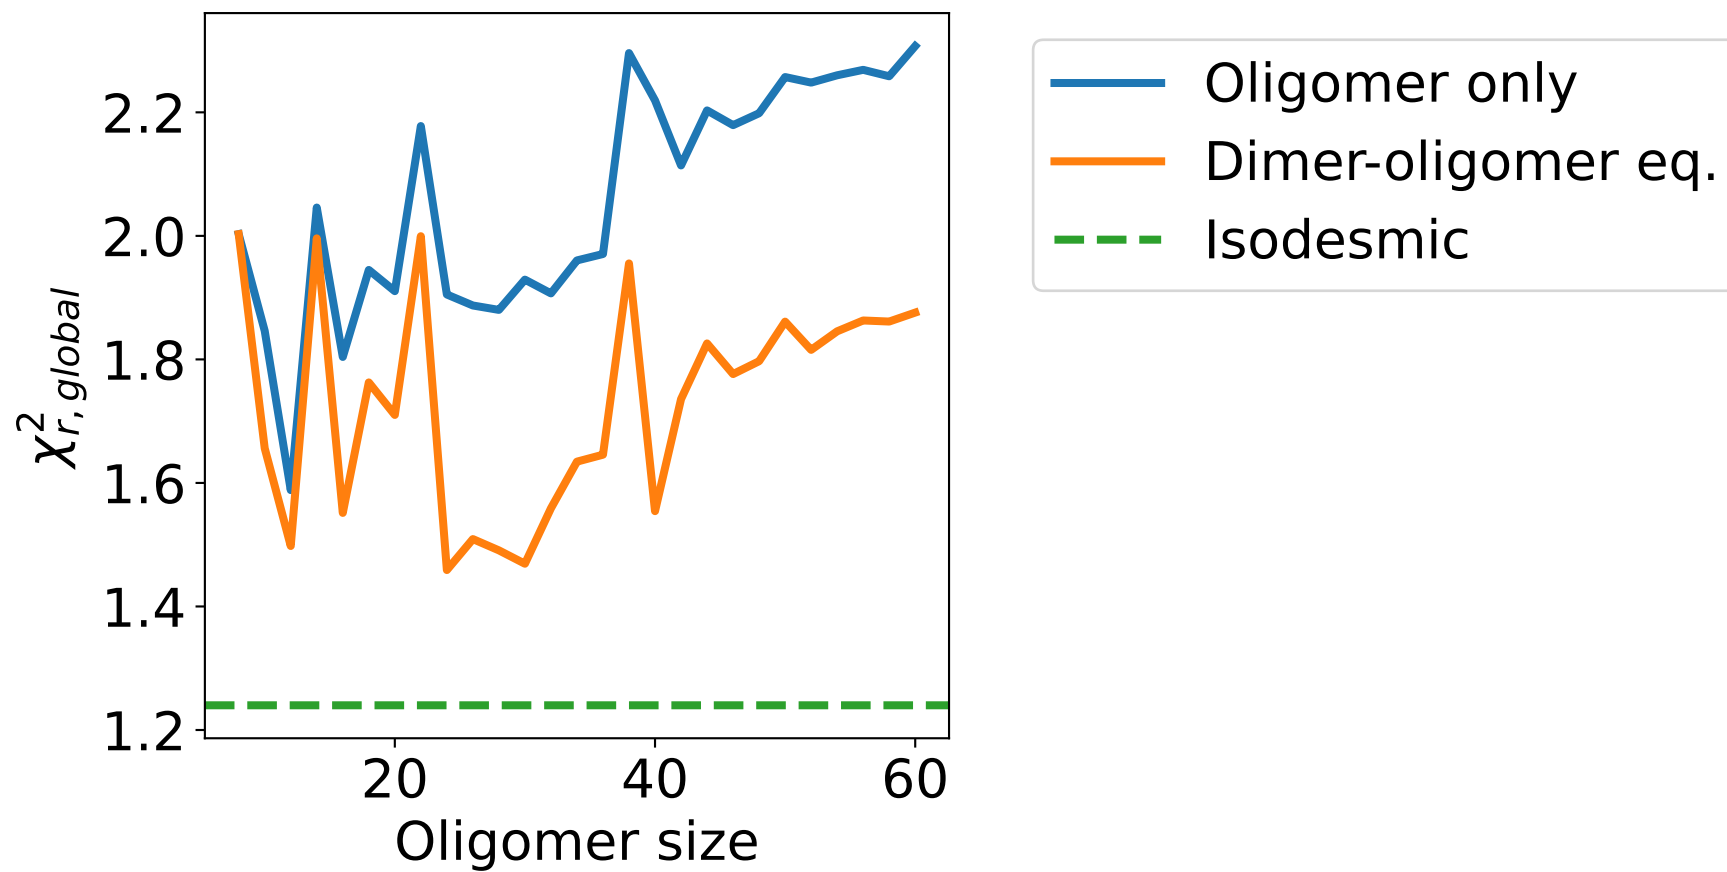

Supplement: supp [file elife-84147-supp-v1.zip]

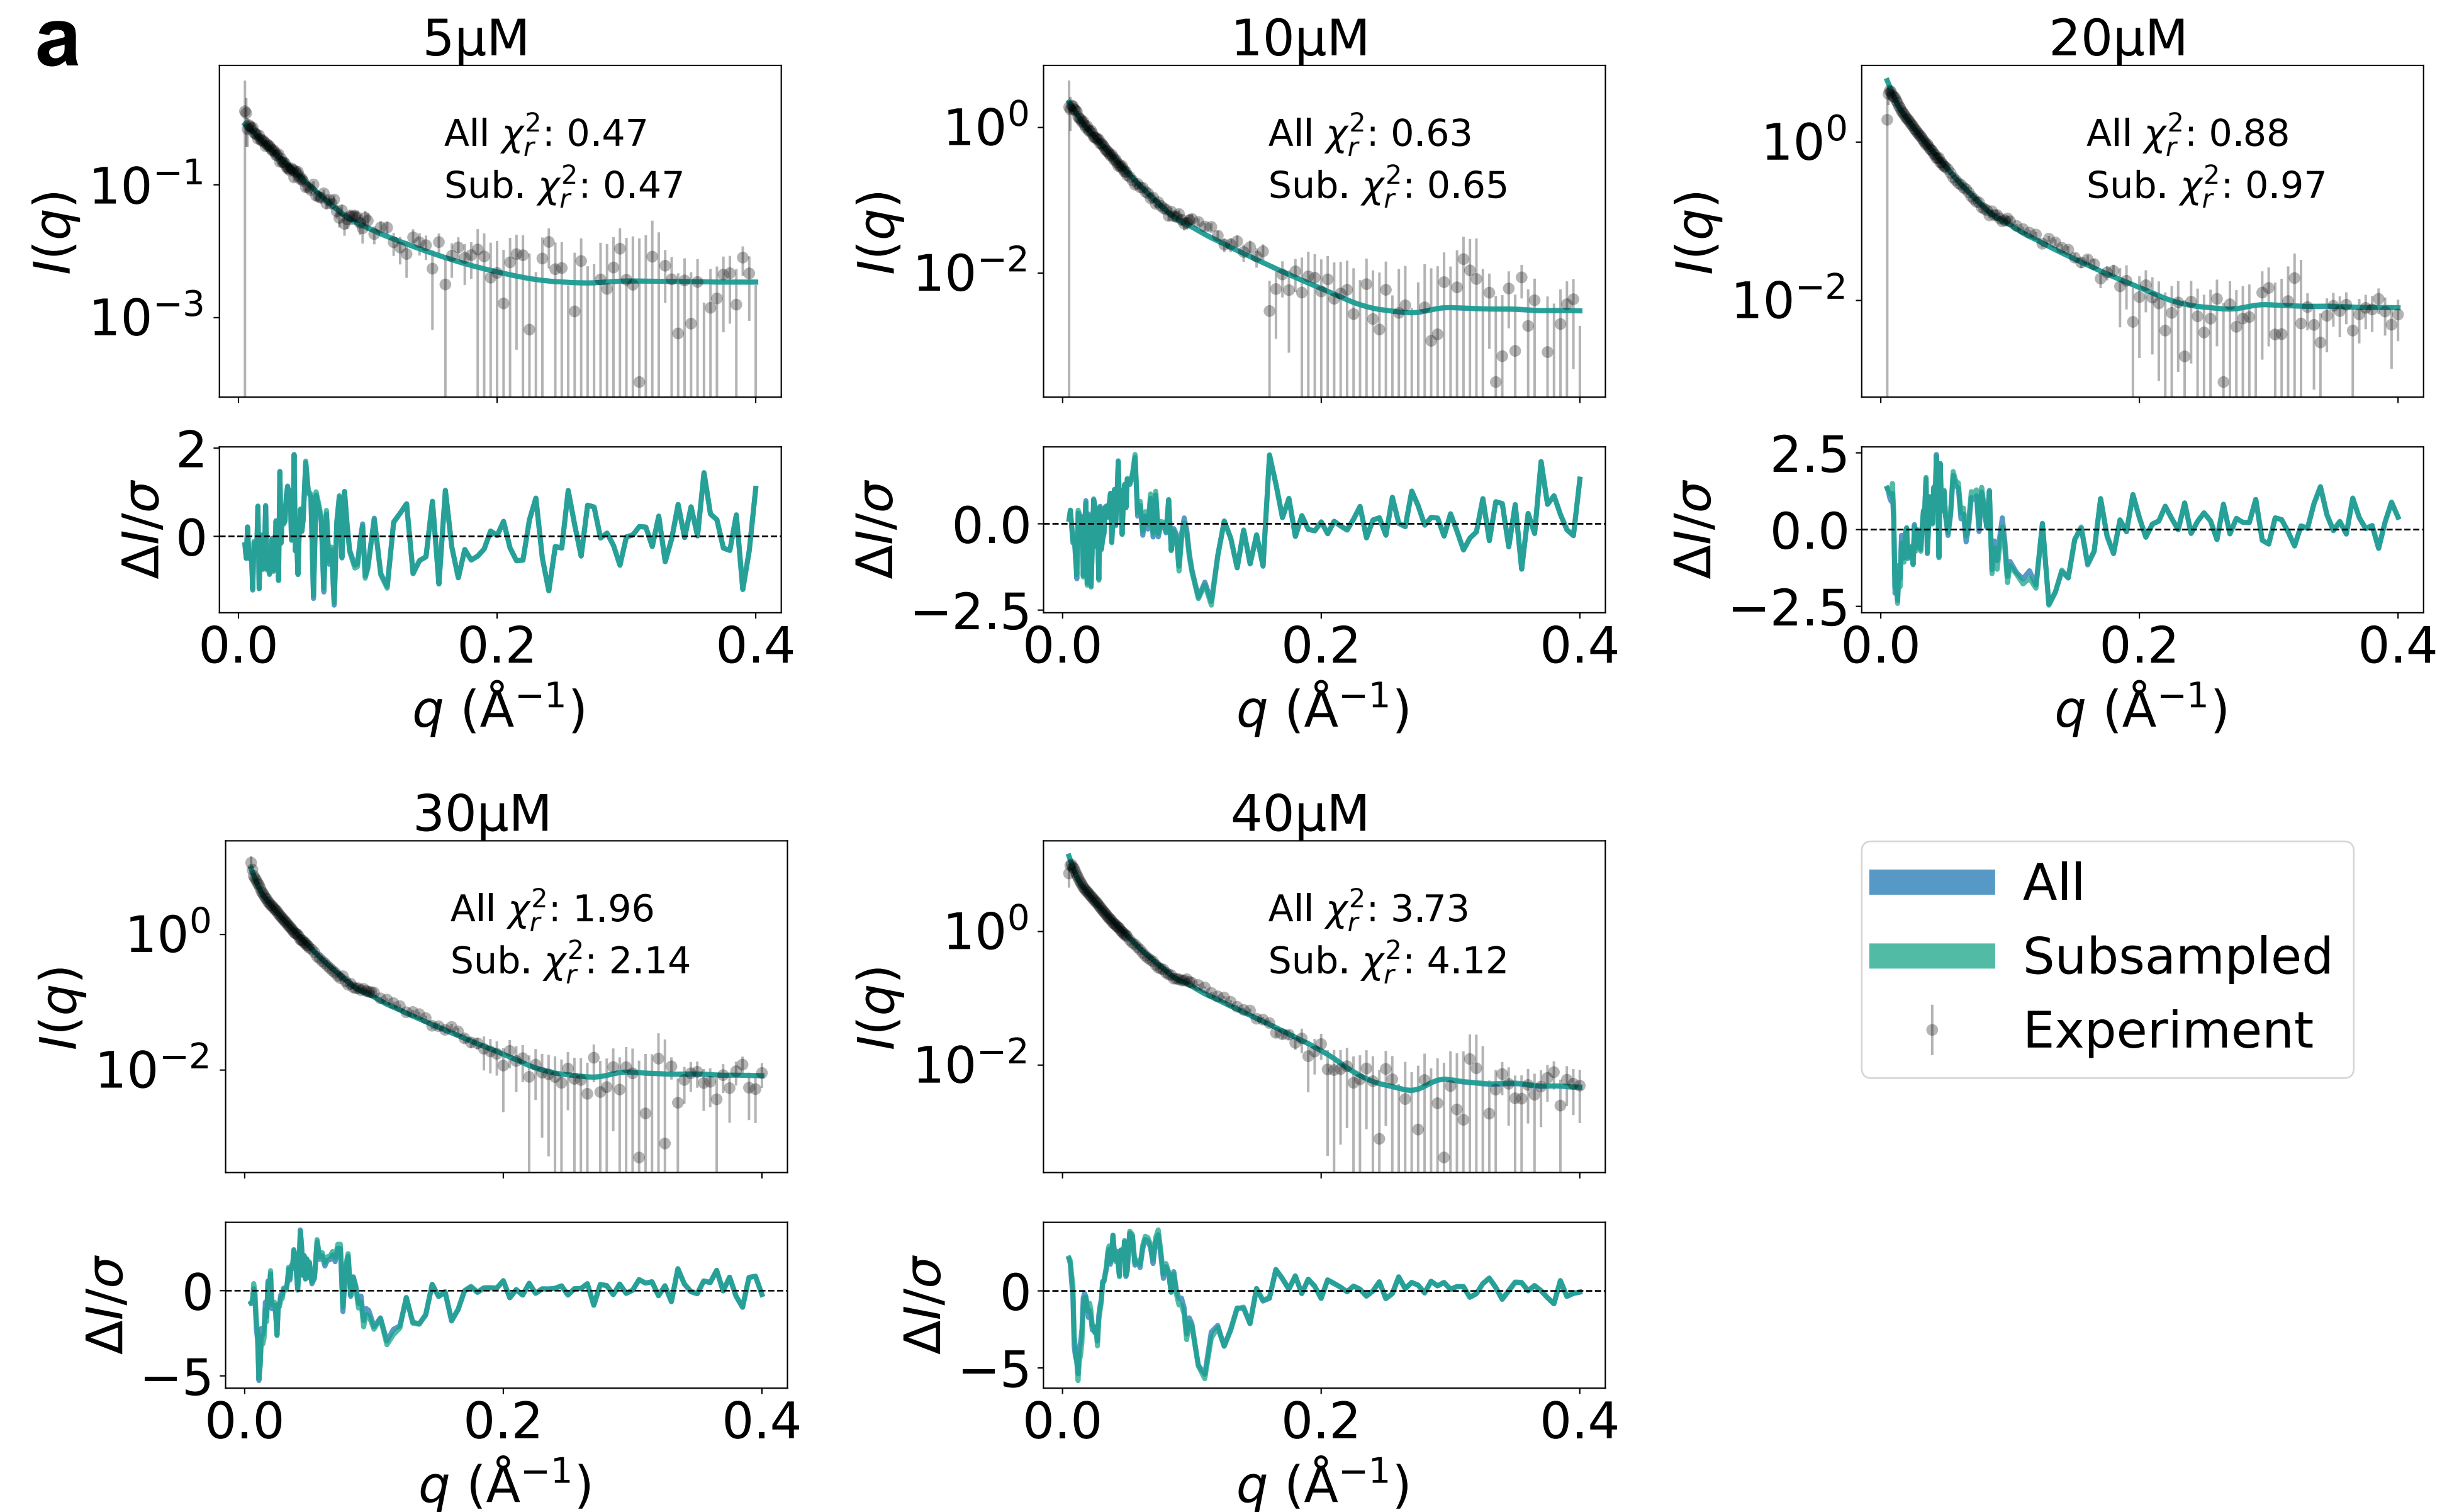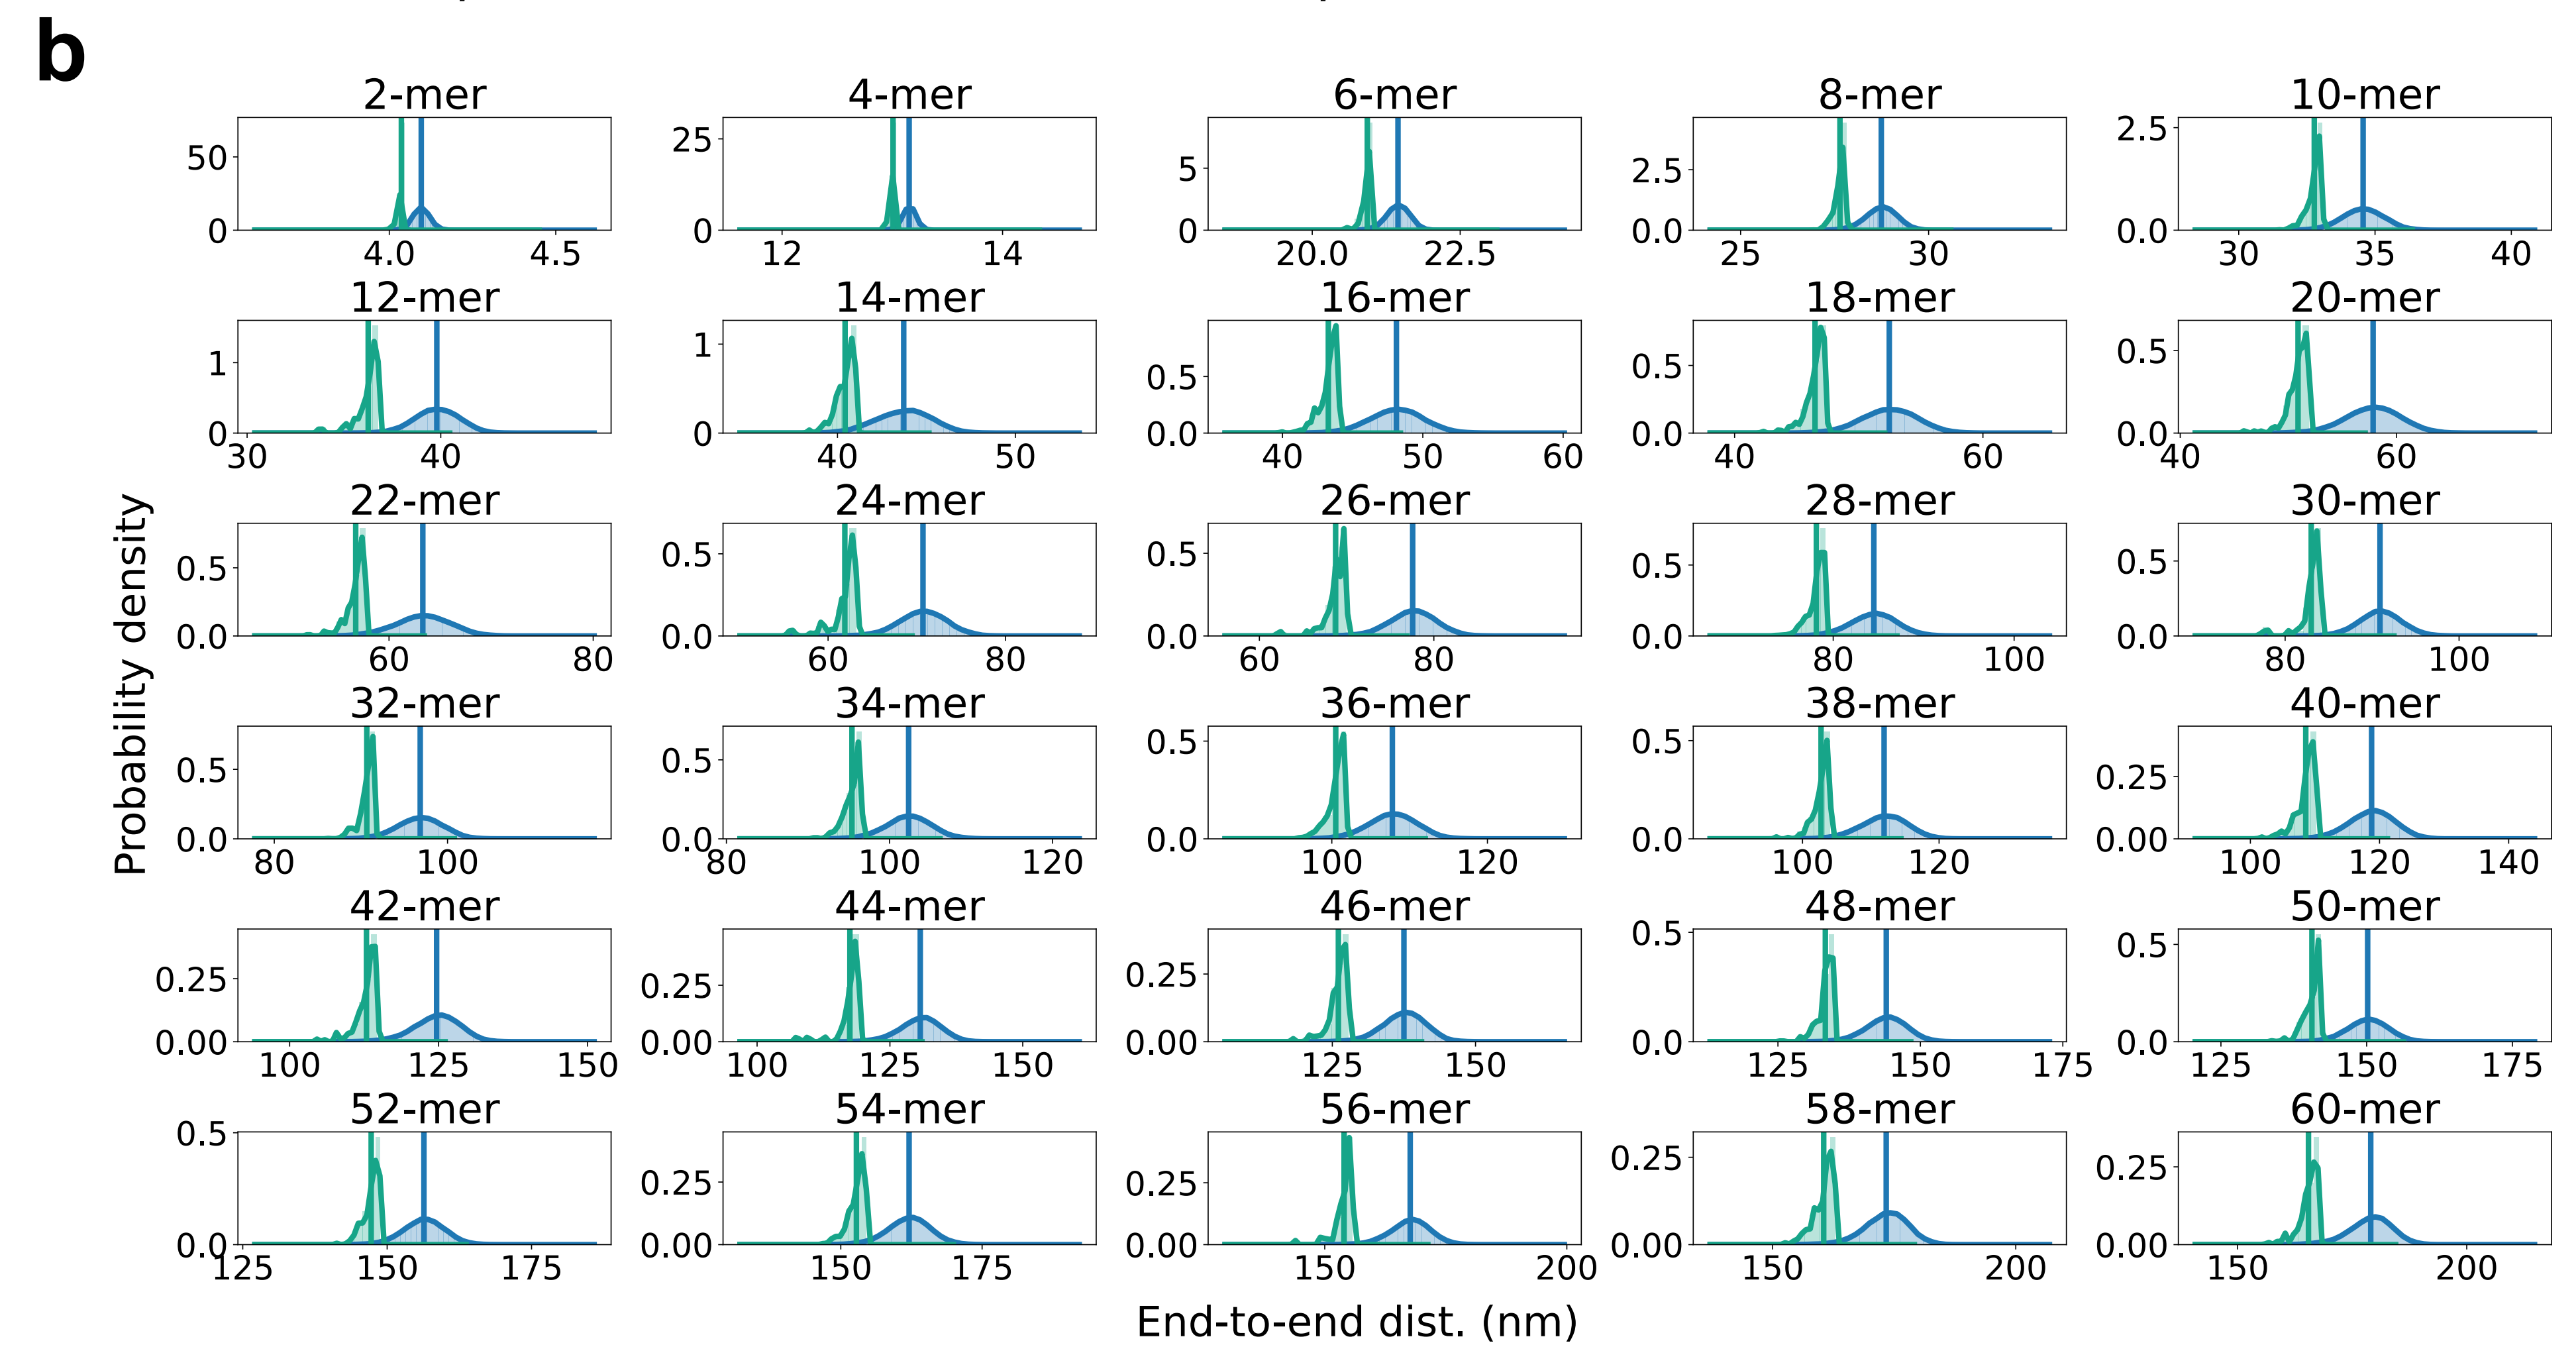

Supplement: supp [file elife-84147-supp-v1.zip]

**a**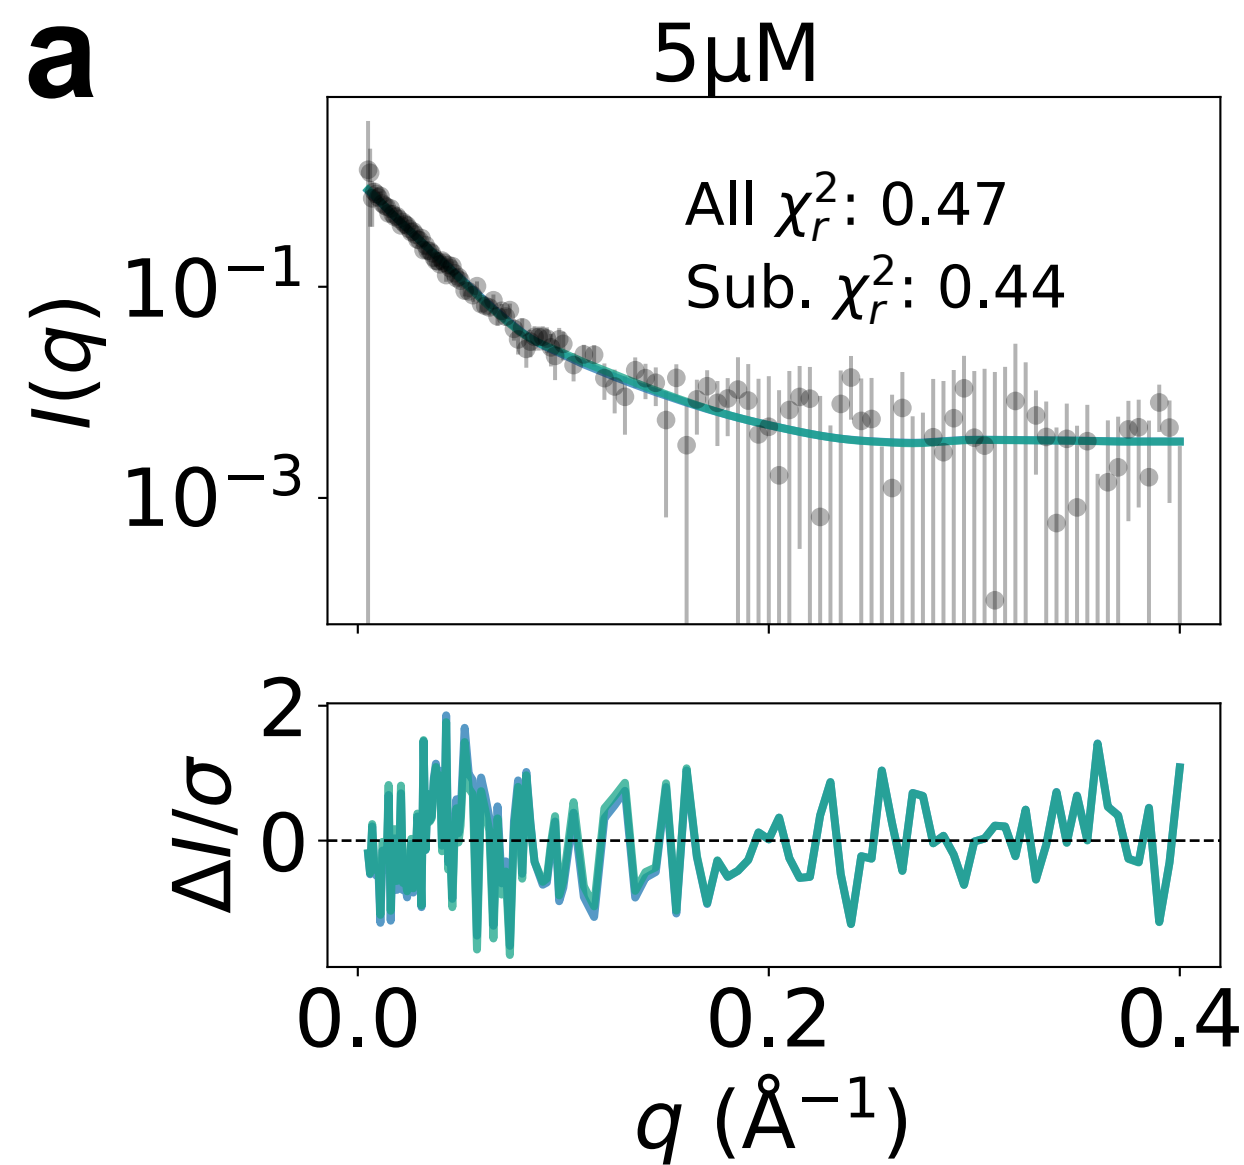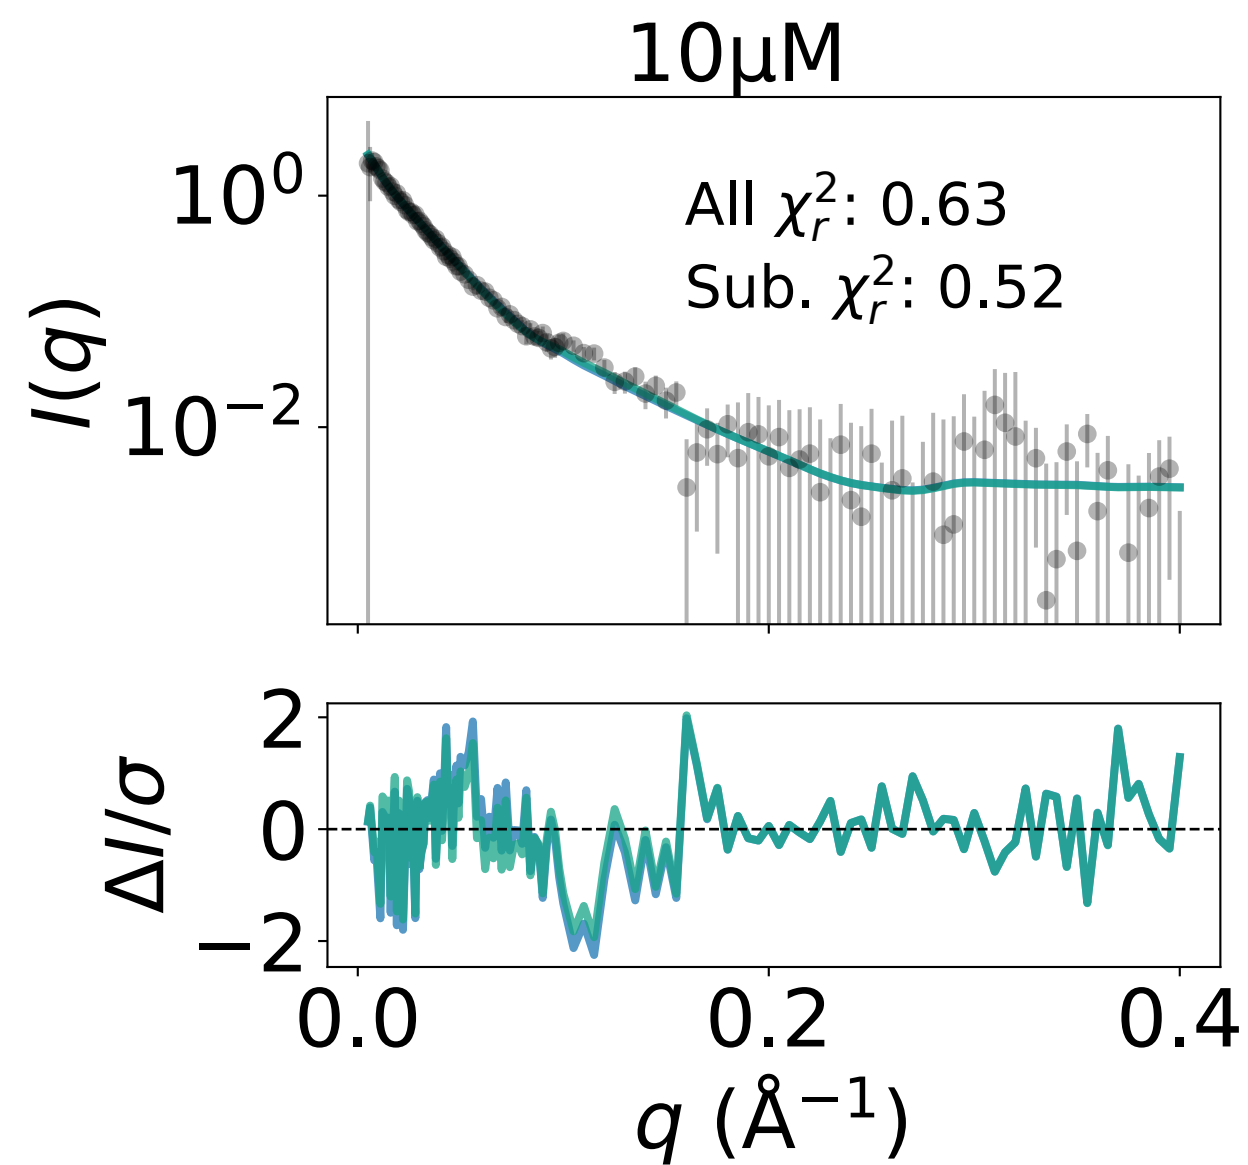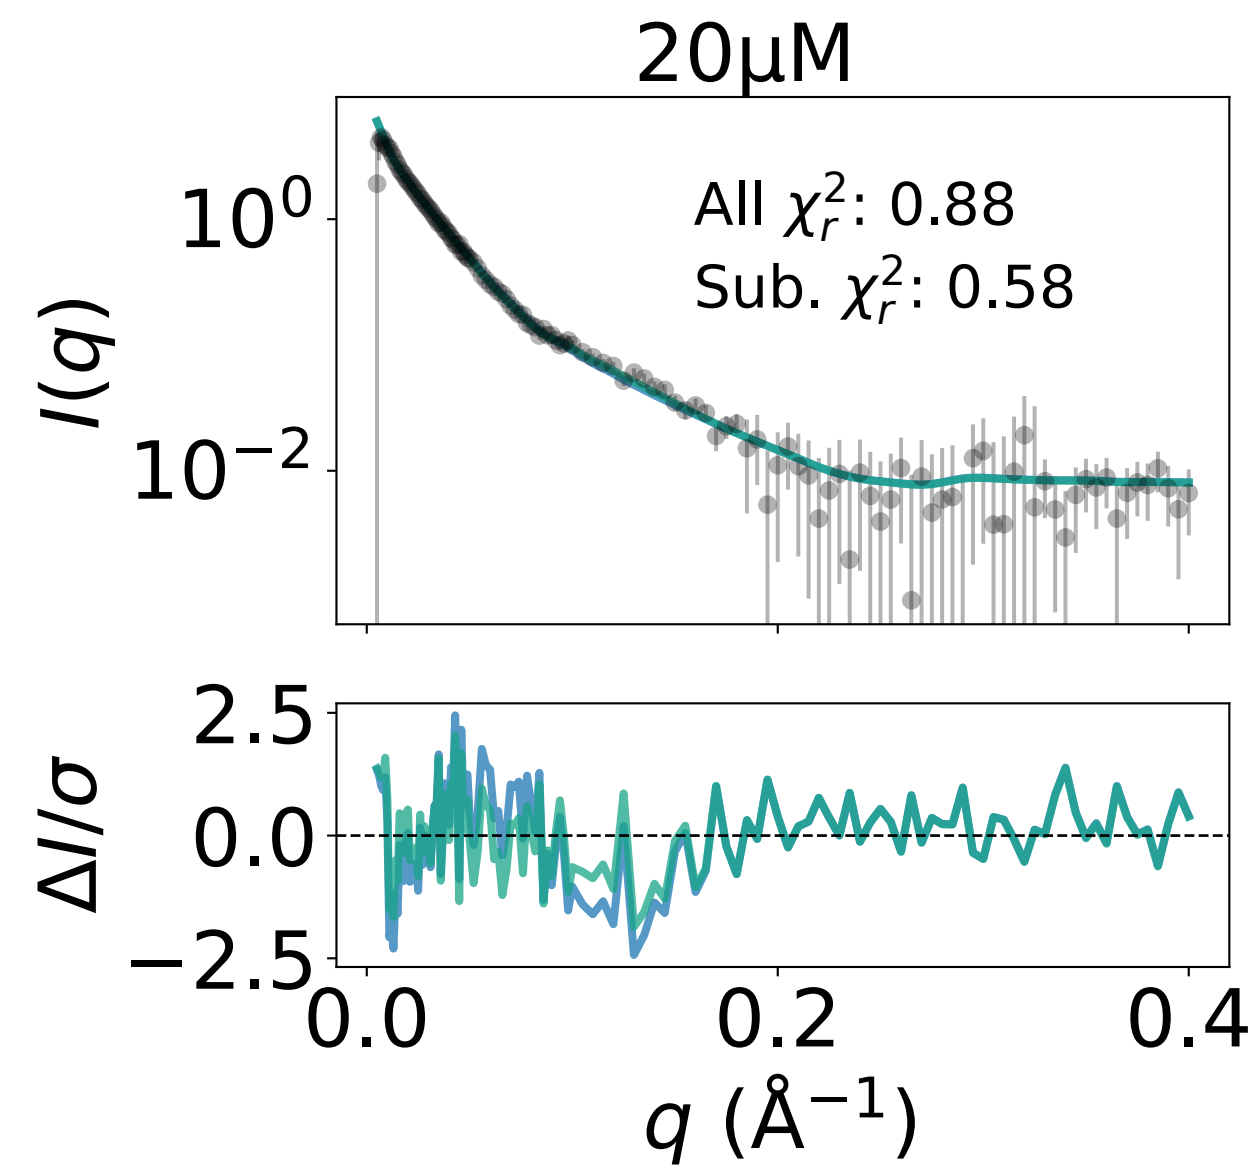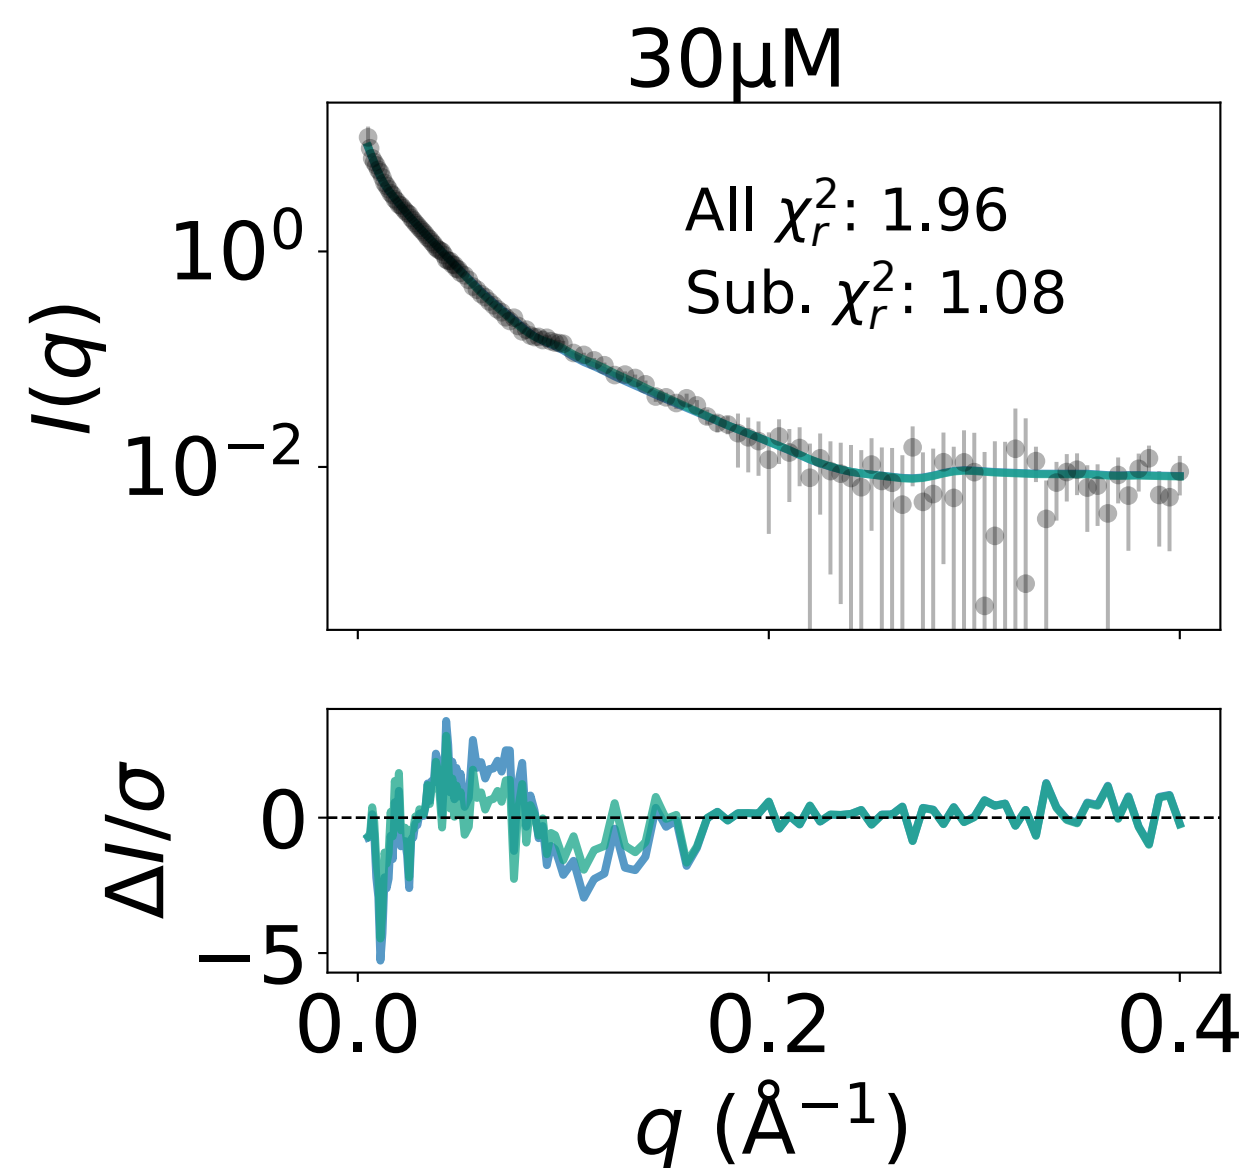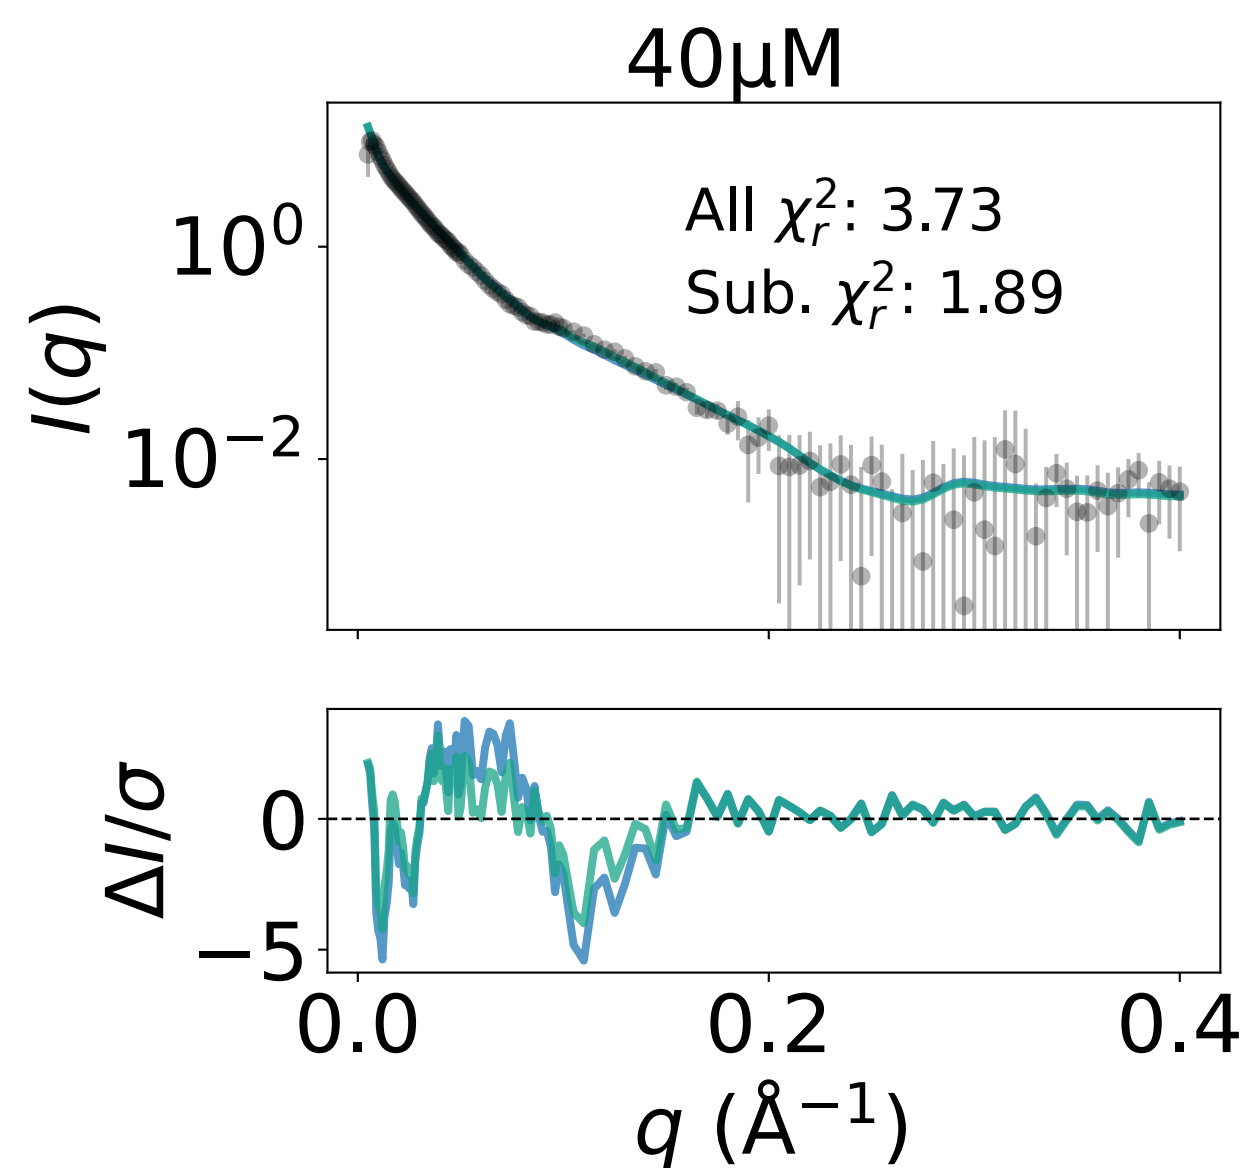**b**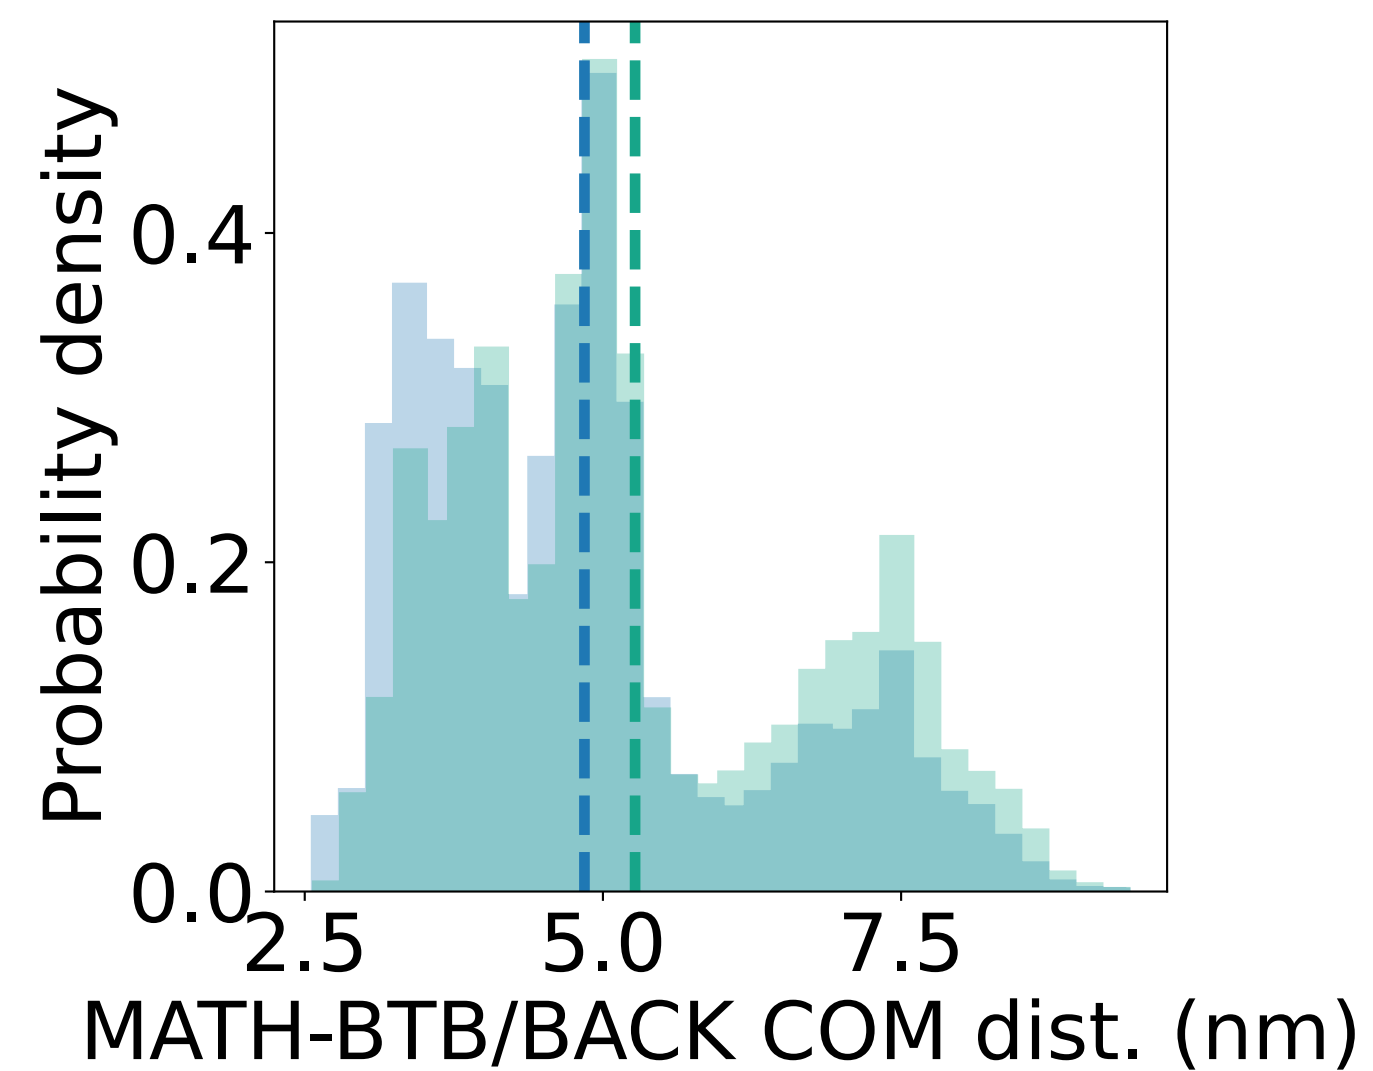

■ All    ■ Subsampled    ● Experiment

Supplement: supp [file elife-84147-supp-v1.zip]

WT, MATH domains free  
before reweighting

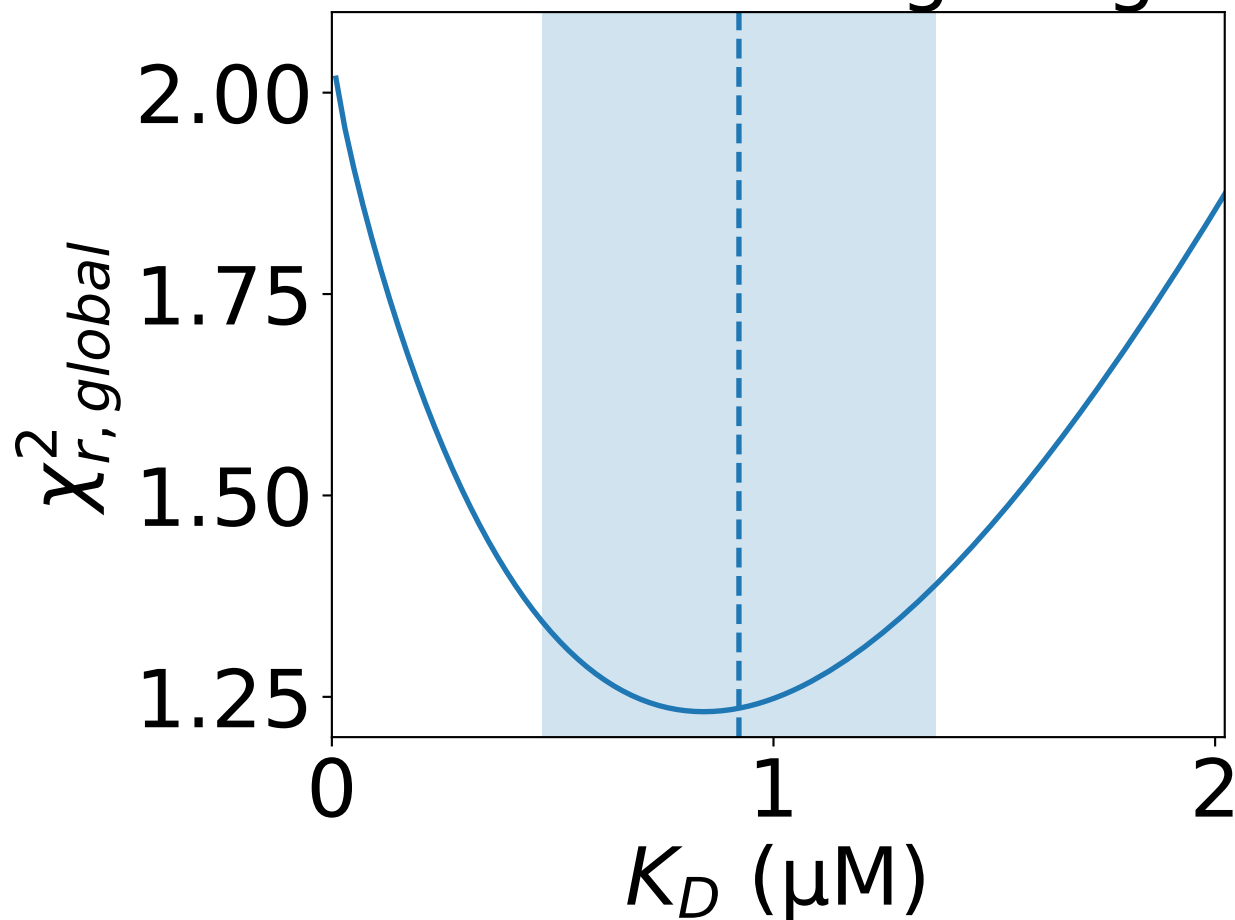

Supplement: supp [file elife-84147-supp-v1.zip]
